# Supplementary material for: Best genome sequencing strategies for annotation of complex immune gene families in wildlife
Source: PubMed Central journal article supplement (PMC9618407; doi:10.1093/gigascience/giac100), 2022-10-30
Supplement: giac100_giga-d-22-00064_original_submission.pdf [file giac100_giga-d-22-00064_original_submission.pdf]

## Best genome sequencing strategies for annotation of complex immune gene families in wildlife

--Manuscript Draft--

|                                                      |                                                                                                                                                                                                                                                                                                                                                                                                                                                                                                                                                                                                                                                                                                                                                                                                                                                                                                                                                                                                                                                                                                                                                                                                                                                                                                                                                                                                                                                                                                                                                                                                                                                                                                                                                                                                                                                                                                                                                                                         |                      |
|------------------------------------------------------|-----------------------------------------------------------------------------------------------------------------------------------------------------------------------------------------------------------------------------------------------------------------------------------------------------------------------------------------------------------------------------------------------------------------------------------------------------------------------------------------------------------------------------------------------------------------------------------------------------------------------------------------------------------------------------------------------------------------------------------------------------------------------------------------------------------------------------------------------------------------------------------------------------------------------------------------------------------------------------------------------------------------------------------------------------------------------------------------------------------------------------------------------------------------------------------------------------------------------------------------------------------------------------------------------------------------------------------------------------------------------------------------------------------------------------------------------------------------------------------------------------------------------------------------------------------------------------------------------------------------------------------------------------------------------------------------------------------------------------------------------------------------------------------------------------------------------------------------------------------------------------------------------------------------------------------------------------------------------------------------|----------------------|
| <b>Manuscript Number:</b>                            | GIGA-D-22-00064                                                                                                                                                                                                                                                                                                                                                                                                                                                                                                                                                                                                                                                                                                                                                                                                                                                                                                                                                                                                                                                                                                                                                                                                                                                                                                                                                                                                                                                                                                                                                                                                                                                                                                                                                                                                                                                                                                                                                                         |                      |
| <b>Full Title:</b>                                   | Best genome sequencing strategies for annotation of complex immune gene families in wildlife                                                                                                                                                                                                                                                                                                                                                                                                                                                                                                                                                                                                                                                                                                                                                                                                                                                                                                                                                                                                                                                                                                                                                                                                                                                                                                                                                                                                                                                                                                                                                                                                                                                                                                                                                                                                                                                                                            |                      |
| <b>Article Type:</b>                                 | Research                                                                                                                                                                                                                                                                                                                                                                                                                                                                                                                                                                                                                                                                                                                                                                                                                                                                                                                                                                                                                                                                                                                                                                                                                                                                                                                                                                                                                                                                                                                                                                                                                                                                                                                                                                                                                                                                                                                                                                                |                      |
| <b>Funding Information:</b>                          | Australian Research Council (DP180102465)                                                                                                                                                                                                                                                                                                                                                                                                                                                                                                                                                                                                                                                                                                                                                                                                                                                                                                                                                                                                                                                                                                                                                                                                                                                                                                                                                                                                                                                                                                                                                                                                                                                                                                                                                                                                                                                                                                                                               | Prof Katherine Belov |
|                                                      | Australian Research Council (CE200100012)                                                                                                                                                                                                                                                                                                                                                                                                                                                                                                                                                                                                                                                                                                                                                                                                                                                                                                                                                                                                                                                                                                                                                                                                                                                                                                                                                                                                                                                                                                                                                                                                                                                                                                                                                                                                                                                                                                                                               | Prof Katherine Belov |
| <b>Abstract:</b>                                     | <p><b>Background</b><br/>The biodiversity crisis and increasing impact of wildlife disease on animal and human health provides impetus for studying immune genes in wildlife. Despite the recent boom in genomes for wildlife species, immune genes are poorly annotated in non-model species owing to their high level of polymorphism and complex genomic organisation. Our research over the past decade and a half on Tasmanian devils and koalas highlights the importance of genomics and accurate immune annotations to investigate disease in wildlife. Given this, we have increasingly been asked the minimum levels of genome quality required to effectively annotate immune genes in order to study immunogenetic diversity. Here we set out to answer this question by manually annotating immune genes in five marsupial genomes and one monotreme genome to determine the impact of sequencing data type, assembly quality and automated annotation on accurate immune annotation.</p> <p><b>Results</b><br/>Genome quality is directly linked to our ability to annotate complex immune gene families, with long reads and scaffolding technologies required to reassemble immune gene clusters and elucidate evolution, organisation and true gene content of the immune repertoire. Draft quality genomes generated from short-reads with HiC or 10x Chromium linked-reads were unable to achieve this. Despite mammalian BUSCOv5 scores of up to 94.1 % amongst the six genomes, automated annotation pipelines incorrectly annotated up to 60% of manually annotated immune genes regardless of assembly quality or method of automated annotation.</p> <p><b>Conclusions</b><br/>Our results demonstrate that long-reads and scaffolding technologies, alongside manual annotation, are required to accurately study the immune gene repertoire of wildlife species.</p> <p><b>Keywords:</b> immune gene, genome, quality, annotation, MHC, wildlife, disease</p> |                      |
| <b>Corresponding Author:</b>                         | Carolyn Hogg<br><br>AUSTRALIA                                                                                                                                                                                                                                                                                                                                                                                                                                                                                                                                                                                                                                                                                                                                                                                                                                                                                                                                                                                                                                                                                                                                                                                                                                                                                                                                                                                                                                                                                                                                                                                                                                                                                                                                                                                                                                                                                                                                                           |                      |
| <b>Corresponding Author Secondary Information:</b>   |                                                                                                                                                                                                                                                                                                                                                                                                                                                                                                                                                                                                                                                                                                                                                                                                                                                                                                                                                                                                                                                                                                                                                                                                                                                                                                                                                                                                                                                                                                                                                                                                                                                                                                                                                                                                                                                                                                                                                                                         |                      |
| <b>Corresponding Author's Institution:</b>           |                                                                                                                                                                                                                                                                                                                                                                                                                                                                                                                                                                                                                                                                                                                                                                                                                                                                                                                                                                                                                                                                                                                                                                                                                                                                                                                                                                                                                                                                                                                                                                                                                                                                                                                                                                                                                                                                                                                                                                                         |                      |
| <b>Corresponding Author's Secondary Institution:</b> |                                                                                                                                                                                                                                                                                                                                                                                                                                                                                                                                                                                                                                                                                                                                                                                                                                                                                                                                                                                                                                                                                                                                                                                                                                                                                                                                                                                                                                                                                                                                                                                                                                                                                                                                                                                                                                                                                                                                                                                         |                      |
| <b>First Author:</b>                                 | Emma Peel                                                                                                                                                                                                                                                                                                                                                                                                                                                                                                                                                                                                                                                                                                                                                                                                                                                                                                                                                                                                                                                                                                                                                                                                                                                                                                                                                                                                                                                                                                                                                                                                                                                                                                                                                                                                                                                                                                                                                                               |                      |
| <b>First Author Secondary Information:</b>           |                                                                                                                                                                                                                                                                                                                                                                                                                                                                                                                                                                                                                                                                                                                                                                                                                                                                                                                                                                                                                                                                                                                                                                                                                                                                                                                                                                                                                                                                                                                                                                                                                                                                                                                                                                                                                                                                                                                                                                                         |                      |
| <b>Order of Authors:</b>                             | Emma Peel                                                                                                                                                                                                                                                                                                                                                                                                                                                                                                                                                                                                                                                                                                                                                                                                                                                                                                                                                                                                                                                                                                                                                                                                                                                                                                                                                                                                                                                                                                                                                                                                                                                                                                                                                                                                                                                                                                                                                                               |                      |
|                                                      | Luke Silver                                                                                                                                                                                                                                                                                                                                                                                                                                                                                                                                                                                                                                                                                                                                                                                                                                                                                                                                                                                                                                                                                                                                                                                                                                                                                                                                                                                                                                                                                                                                                                                                                                                                                                                                                                                                                                                                                                                                                                             |                      |
|                                                      | Parice Brandies                                                                                                                                                                                                                                                                                                                                                                                                                                                                                                                                                                                                                                                                                                                                                                                                                                                                                                                                                                                                                                                                                                                                                                                                                                                                                                                                                                                                                                                                                                                                                                                                                                                                                                                                                                                                                                                                                                                                                                         |                      |
|                                                      | Ying Zhu                                                                                                                                                                                                                                                                                                                                                                                                                                                                                                                                                                                                                                                                                                                                                                                                                                                                                                                                                                                                                                                                                                                                                                                                                                                                                                                                                                                                                                                                                                                                                                                                                                                                                                                                                                                                                                                                                                                                                                                |                      |

|                                                                                                                                                                                                                                                                                                                                                                                                                                                                                                                          |                                                                                                                                                                                                                                                                                 |
|--------------------------------------------------------------------------------------------------------------------------------------------------------------------------------------------------------------------------------------------------------------------------------------------------------------------------------------------------------------------------------------------------------------------------------------------------------------------------------------------------------------------------|---------------------------------------------------------------------------------------------------------------------------------------------------------------------------------------------------------------------------------------------------------------------------------|
|                                                                                                                                                                                                                                                                                                                                                                                                                                                                                                                          | Yuanyuan Cheng                                                                                                                                                                                                                                                                  |
|                                                                                                                                                                                                                                                                                                                                                                                                                                                                                                                          | Carolyn Hogg                                                                                                                                                                                                                                                                    |
|                                                                                                                                                                                                                                                                                                                                                                                                                                                                                                                          | Katherine Belov                                                                                                                                                                                                                                                                 |
| <b>Order of Authors Secondary Information:</b>                                                                                                                                                                                                                                                                                                                                                                                                                                                                           |                                                                                                                                                                                                                                                                                 |
| <b>Additional Information:</b>                                                                                                                                                                                                                                                                                                                                                                                                                                                                                           |                                                                                                                                                                                                                                                                                 |
| <b>Question</b>                                                                                                                                                                                                                                                                                                                                                                                                                                                                                                          | <b>Response</b>                                                                                                                                                                                                                                                                 |
| Are you submitting this manuscript to a special series or article collection?                                                                                                                                                                                                                                                                                                                                                                                                                                            | No                                                                                                                                                                                                                                                                              |
| <p><b>Experimental design and statistics</b></p> <p>Full details of the experimental design and statistical methods used should be given in the Methods section, as detailed in our <a href="#">Minimum Standards Reporting Checklist</a>. Information essential to interpreting the data presented should be made available in the figure legends.</p> <p>Have you included all the information requested in your manuscript?</p>                                                                                       | No                                                                                                                                                                                                                                                                              |
| <p>If not, please give reasons for any omissions below.</p> <p>as follow-up to "<b>Experimental design and statistics</b></p> <p>Full details of the experimental design and statistical methods used should be given in the Methods section, as detailed in our <a href="#">Minimum Standards Reporting Checklist</a>. Information essential to interpreting the data presented should be made available in the figure legends.</p> <p>Have you included all the information requested in your manuscript?</p> <p>"</p> | The data included in this manuscript uses published genomic data to show complexities of immune gene annotation with varying degrees of genome quality. The method design is around genome assembly and annotation and all the relevant metrics are included in the manuscript. |
| <p><b>Resources</b></p> <p>A description of all resources used, including antibodies, cell lines, animals</p>                                                                                                                                                                                                                                                                                                                                                                                                            | Yes                                                                                                                                                                                                                                                                             |

|                                                                                                                                                                                                                                                                                                                                                                                                                                                                                                                                                         |            |
|---------------------------------------------------------------------------------------------------------------------------------------------------------------------------------------------------------------------------------------------------------------------------------------------------------------------------------------------------------------------------------------------------------------------------------------------------------------------------------------------------------------------------------------------------------|------------|
| <p>and software tools, with enough information to allow them to be uniquely identified, should be included in the Methods section. Authors are strongly encouraged to cite <a href="#">Research Resource Identifiers</a> (RRIDs) for antibodies, model organisms and tools, where possible.</p> <p>Have you included the information requested as detailed in our <a href="#">Minimum Standards Reporting Checklist</a>?</p>                                                                                                                            |            |
| <p><b>Availability of data and materials</b></p> <p>All datasets and code on which the conclusions of the paper rely must be either included in your submission or deposited in <a href="#">publicly available repositories</a> (where available and ethically appropriate), referencing such data using a unique identifier in the references and in the “Availability of Data and Materials” section of your manuscript.</p> <p>Have you have met the above requirement as detailed in our <a href="#">Minimum Standards Reporting Checklist</a>?</p> | <p>Yes</p> |

1 Best genome sequencing strategies for annotation of complex  
2 immune gene families in wildlife

3 Emma Peel<sup>1</sup>, Luke Silver<sup>1</sup>, Parice Brandies<sup>1</sup>, Ying Zhu<sup>2</sup>, Yuanyuan Cheng<sup>1</sup>, Carolyn J Hogg<sup>1</sup> & Katherine  
4 Belov<sup>1\*</sup>

5 <sup>1</sup>School of Life and Environmental Sciences, The University of Sydney, Sydney, New South Wales,  
6 Australia

7 <sup>2</sup> Sichuan Provincial Academy of Natural Resource Sciences, Chengdu, Sichuan, China

8 emma.peel@sydney.edu.au ORCID: 0000-0002-2335-8983

9 [luke.silver@sydney.edu.au](mailto:luke.silver@sydney.edu.au) ORCID: 0000-0002-1718-5756

10 [parice.brandies@sydney.edu.au](mailto:parice.brandies@sydney.edu.au) ORCID: 0000-0003-1702-2938

11 [so\\_zy2003@126.com](mailto:so_zy2003@126.com)

12 [yuanyuan.cheng@sydney.edu.au](mailto:yuanyuan.cheng@sydney.edu.au) ORCID: 0000-0002-1747-9308

13 [carolyn.hogg@sydney.edu.au](mailto:carolyn.hogg@sydney.edu.au) ORCID: 0000-0002-6328-398X

14 \*Corresponding author [kathy.belov@sydney.edu.au](mailto:kathy.belov@sydney.edu.au) ORCID: 0000-0002-9762-5554

15

16

17

18

19

20

21

22

23

## 24 **Abstract**

### 25 **Background**

26 The biodiversity crisis and increasing impact of wildlife disease on animal and human health provides  
27 impetus for studying immune genes in wildlife. Despite the recent boom in genomes for wildlife  
28 species, immune genes are poorly annotated in non-model species owing to their high level of  
29 polymorphism and complex genomic organisation. Our research over the past decade and a half on  
30 Tasmanian devils and koalas highlights the importance of genomics and accurate immune annotations  
31 to investigate disease in wildlife. Given this, we have increasingly been asked the minimum levels of  
32 genome quality required to effectively annotate immune genes in order to study immunogenetic  
33 diversity. Here we set out to answer this question by manually annotating immune genes in five  
34 marsupial genomes and one monotreme genome to determine the impact of sequencing data type,  
35 assembly quality and automated annotation on accurate immune annotation.

### 36 **Results**

37 Genome quality is directly linked to our ability to annotate complex immune gene families, with long  
38 reads and scaffolding technologies required to reassemble immune gene clusters and elucidate  
39 evolution, organisation and true gene content of the immune repertoire. Draft quality genomes  
40 generated from short-reads with HiC or 10x Chromium linked-reads were unable to achieve this.  
41 Despite mammalian BUSCOv5 scores of up to 94.1 % amongst the six genomes, automated annotation  
42 pipelines incorrectly annotated up to 60% of manually annotated immune genes regardless of  
43 assembly quality or method of automated annotation.

### 44 **Conclusions**

45 Our results demonstrate that long-reads and scaffolding technologies, alongside manual annotation,  
46 are required to accurately study the immune gene repertoire of wildlife species.

47 **Keywords:** immune gene, genome, quality, annotation, MHC, wildlife, disease

## 48 Background

49 Globally we are facing a biodiversity crisis, with 25% of known plant and animal species under threat  
50 and one million species facing extinction [1]. Disease is one of many drivers of global wildlife decline  
51 and extinction, with recent devastating examples such as chytridiomycosis in amphibians [2], white  
52 nose syndrome in bats [3] and devil facial tumour disease (DFTD) in Tasmanian devils (*Sarcophilus*  
53 *harrisii*) [4]. Habitat loss, fragmentation and climate change lead to population decline and subsequent  
54 loss of genetic diversity, which increases susceptibility of populations to new and existing disease  
55 threats [5].

56 Genomics is increasingly applied in conservation [6] facilitated by a boom in genomes for wildlife  
57 species [7-10], with over 4,000 vertebrate genomes currently accessioned with the National Center  
58 for Biotechnology Information (NCBI) (March 2022). Genomics in conservation typically involves  
59 technologies such as reduced representation sequencing which capture single nucleotide  
60 polymorphisms (SNPs) with a bias towards neutral regions of the genome [11, 12]. This can be used  
61 to investigate population genetic metrics such as heterozygosity, inbreeding and relatedness to inform  
62 conservation management. This is a cost-effective approach for conservation and has been used in a  
63 range of taxa to inform conservation actions, for examples see Tasmanian devils [13], gorillas (*Gorillia*  
64 *gorilla gorilla* and *Gorilla beringei graueri*) [14], helmeted honeyeaters (*Lichenostomus melanops*  
65 *cassidix*) [15] and bilbies (*Macrotis lagotis*) [16].

66 The COVID-19 pandemic is one of many examples which highlight the ever-increasing importance of  
67 understanding wildlife immunity and disease to better understand and manage disease spill over [17].  
68 In the case of wildlife threatened by disease, conservation questions are more challenging to answer  
69 and typically involve immunogenetic diversity which relies on accurate immune gene annotations.  
70 Immune genes are some of the most polymorphic regions of the genome, owing to the need to  
71 generate diversity in response to ever-changing pathogenic pressures [18, 19]. Diversity within these  
72 gene families is generated through gene duplication, gene copy number variation, SNPs and rapid

73 evolution, resulting in a complex genomic organisation and high level of pseudogenization [18].  
74 Generally, immune genes are encoded within clusters in the genome, especially highly duplicated  
75 families such as the major histocompatibility complex (MHC) and natural killer cell (NK) receptors [20].  
76 Given these factors, accurate assembly and annotation of genomic regions encoding immune genes  
77 can be challenging [21-23], especially in wildlife.

78 Automated annotation pipelines such as MAKER [24] and Fgenesh++ [25] are accurate at identifying  
79 the majority of protein-coding genes within a genome [26, 27]. However, they are less effective at  
80 characterising complex and highly variable gene families such as immune genes [28, 29] which are  
81 misassembled even in the high-quality human genome [21]. As such, manual annotation and curation  
82 of immune genes is required, which is conducted for model organism genomes accessioned with  
83 Ensembl [30]. Wildlife are not currently included in this scope, and hence immune genes are poorly  
84 annotated, or not annotated at all, in many species.

85 Advances in sequencing technology means chromosome-length genomes are now achievable for a  
86 range of species [8]. Use of multiple sequencing, scaffolding, chromatin conformation and optical  
87 mapping technologies leads to accurate assembly of complex and variable genomic regions, such as  
88 immune genes [8]. However, the high input sample quantity and quality requirements are not always  
89 feasible for wildlife [31]. This leads to the use of lower-input short-read sequencing to generate a  
90 draft-quality genome assembled into scaffolds. However, short-read sequencing is well known to be  
91 incompetent at resolving highly repetitive and complex gene regions [32, 33]. While scaffolding  
92 technologies can improve contiguity of these assemblies, complex and variable regions often remain  
93 fragmented. The need to balance budget, sample and genome assembly quality against accurate  
94 immune gene annotation is essential to answer questions around disease and immunity.

95 Over the past decade and a half our research has focused on immunity and disease in two iconic  
96 marsupial species; the Tasmanian devil and koala (*Phascolarctos cinereus*). During this period, we have  
97 worked with bacterial artificial chromosome (BAC) and complementary DNA (cDNA) libraries and draft

98 genomes of varying qualities. Our research, and that of others, has been crucial for understanding,  
99 managing and preventing disease-induced decline [4, 34-36]. As the cost of sequencing has dropped,  
100 and the appreciation of the power of genetics and genomics for population management has  
101 increased, we have increasingly been asked about the minimum levels of genome quality required to  
102 be able to effectively annotate immune genes in order to study levels of diversity in wild populations.  
103 Here we set out to answer that question.

104 Tasmanian devils are threatened by DFTD, a contagious cancer which has decimated over 80% of the  
105 population since it was first documented in 1996 [4]. The Tasmanian devil reference genome was  
106 sequenced using illumina short-reads in 2012 [37], generating a 3.17 Gbp genome with a scaffold N50  
107 of 1.8 Mbp and contig N50 of 20kbp. The Major Histocompatibility Complex was not able to be  
108 annotated in the draft genome due to the high levels of fragmentation, scattered across at least 15  
109 scaffolds. But manual annotation was possible alongside transcriptomes [38-40] and targeted  
110 sequencing of MHC-positive BAC clones [38, 41-45]. Development of MHC markers led to  
111 determination of gene copy number and nucleotide variation amongst the devil population, revealing  
112 devils have low MHC diversity, much of which is shared with DFTD [43, 46]. The low histocompatibility  
113 barriers, coupled with downregulation of tumour MHC expression, allows DFTD to transmit between  
114 individuals and evade the host immune response [44]. Recent MHC genotyping using long-read  
115 sequencing enabled the identification of full-phased MHC alleles and separation of highly similar  
116 alleles (1bp difference), resulting in the identification of new functional MHC diversity within the devil  
117 population [47].

118 The koala is another iconic Australian marsupial where disease is a major contributing factor to  
119 population decline [48]. Chlamydiosis is one of many threatening processes affecting koalas, a disease  
120 caused by infection with the intracellular bacterium *Chlamydia pecorum* [48]. A chromosome-length  
121 koala reference genome was sequenced in 2018 using Pacifi Biosciences (PacBio) long-reads, Illumina  
122 short-reads and BioNano optical maps [49]. This generated a 3.19 Gbp assembly with a scaffold N50



123 of 480 Mbp and contig N50 of 11.4 Mbp [49], a 400-fold increase in scaffold contiguity compared to  
124 the Tasmanian devil genome assembly [37]. This high-quality koala genome enabled accurate  
125 annotation of immune gene families, including the first complete reconstruction of MHC and T cell  
126 receptor gene clusters from a genome sequence in marsupials [35, 50-52]. Preliminary genome  
127 resequencing identified that variants within IFN $\gamma$ , TNF $\alpha$  and MHC genes are essential for clearance of  
128 *Chlamydia* in koalas [34]. MHC genotype has also been linked to disease susceptibility and severity in  
129 different koala populations [53, 54].

130 Understanding the role of immunogenetics in DFTD and chlamydiosis formed the basis for the  
131 development of vaccines in devils [55] and koalas [56] respectively. Several chlamydial vaccines have  
132 been developed for koalas over the past decade, culminating in a multivalent vaccine that induces a  
133 strong and protective immune response which may be therapeutic [34, 56]. Current DFTD vaccines in  
134 devils similarly hinge upon the host immune response and are based on IFN $\gamma$ -treated DFTD cells which  
135 result in MHC expression on the cell surface resulting in immune recognition and clearance of the  
136 tumour [55].

137 In this study, our aim was to determine the impact of sequence data type, assembly quality and  
138 automated annotation on accurate immune annotation. To achieve this, we manually annotated  
139 immune genes in the genomes of five marsupials and one monotreme. These include recent published  
140 genome assemblies of five marsupials; koala (*Phascolarctos cinereus*) [49, 57, 58], woylie (*Bettongia*  
141 *penicillata*) [59], common wombat (*Vombatus ursinus*) [57, 58], brown antechinus (*Antechinus*  
142 *stuartii*) [60] and numbat (*Myrmecobius fasciatus*) [61], and previous immune gene annotations from  
143 one monotreme, the platypus [33]. These six genomes differ in quality, from scaffold assemblies  
144 generated using only 10x Chromium linked-reads (numbat, antechinus), short-read with high-  
145 throughput chromosome conformation capture (HiC) (wombat), long and short-read (woylie), to high-  
146 quality chromosome-length genomes generated using multiple data types (koala and platypus) (Table  
147 1). In addition, we assess the accuracy of automated immune gene annotation by Fgenesh++, MAKER

148 and NCBI pipelines in these non-model species. Although this is not a perfect comparison given  
 149 species-specific immune gene expansion/contraction, it provides a guide of the impact of genome  
 150 quality on immune gene annotation. Here we show that high quality chromosome-length genomes  
 151 are necessary for accurate immune annotation in the context of wildlife disease.

## 152 Analyses

153 Immune genes were annotated in the koala, woylie, wombat, antechinus, and numbat genomes and  
 154 transcriptomes using similarity-based search methods such as BLAST [62] and HMMER [63] with  
 155 known marsupial immune gene sequences as queries. This resulted in the manual characterisation of  
 156 over 2,700 immune genes amongst the five species, from six immune gene families or groups: toll-like  
 157 receptors (TLR), T cell receptors (TCR), immunoglobulins (IG), major histocompatibility complex  
 158 (MHC), natural killer (NK) cell receptors and cytokines (Table 2). Platypus immune gene families have  
 159 previously been annotated [33, 64-75], some of which had already been mapped within the current  
 160 genome assembly (MHC and TCR) [33] and the remainder were mapped in this study. Genomic  
 161 coordinates of all immune genes annotated in this study are available in Additional file 1. A  
 162 comprehensive summary of results for each immune gene family are available in Additional file 2.

163 Table 1. Assembly metrics for the five marsupial and one monotreme genome used in this study.

|                      | Koala<br>[49, 57, 58]                                                                | Woylie<br>[59]                                          | Wombat<br>[57, 58]       | Antechinus<br>[60]                            | Numbat<br>[61]                               | Platypus<br>[33]                                                                                            |
|----------------------|--------------------------------------------------------------------------------------|---------------------------------------------------------|--------------------------|-----------------------------------------------|----------------------------------------------|-------------------------------------------------------------------------------------------------------------|
| Data types           | PacBio RS II<br>Illumina<br>BioNano<br>HiC (DNAzoo)<br>RNAseq (16<br>transcriptomes) | PacBio HiFi<br>Illumina<br>RNAseq (4<br>transcriptomes) | Illumina<br>HiC (DNAzoo) | 10x Chromium<br>RNAseq (12<br>transcriptomes) | 10x Chromium<br>RNAseq (3<br>transcriptomes) | PacBio<br>10x Chromium<br>BioNano<br>HiC (Phase<br>genomics &<br>Dovetail)<br>RNAseq (19<br>transcriptomes) |
| Genome size<br>(Gbp) | 3.19                                                                                 | 3.39                                                    | 3.34                     | 3.31                                          | 3.42                                         | 2.13                                                                                                        |
| GC (%)               | 39.05                                                                                | 38.64                                                   | 38.89                    | 36.20                                         | 36.3                                         | 46.23                                                                                                       |
| No. scaffolds        | 1,318                                                                                | 1,116                                                   | 633,737                  | 30,876                                        | 112,299                                      | 322                                                                                                         |
| No. contigs          | 1,935                                                                                | 3,016                                                   | 685,859                  | 106,199                                       | 219,447                                      | 834                                                                                                         |

|                                |        |       |       |       |       |       |
|--------------------------------|--------|-------|-------|-------|-------|-------|
| Scaffold N50 (Mbp)             | 480.11 | 6.94  | 576.1 | 72.7  | 0.223 | 83.33 |
| Contig N50 (Mbp)               | 11.4   | 1.995 | 0.07  | 0.08  | 0.038 | 15.1  |
| Gaps (%)                       | 0.01   | 0.403 | 0.54  | 2.75  | 3.52  | 0.81  |
| Complete mammalian BUSCOv5.2.2 | 94.1%  | 94.1% | 89.3% | 92.5% | 76.4% | 83.0% |

164

165 Table 2. Number of annotated immune genes in each of the five marsupials and one monotreme in

166 this study.

|                            | Koala | Woylie | Wombat | Antechinus | Numbat | Platypus |
|----------------------------|-------|--------|--------|------------|--------|----------|
| TLR                        | 10    | 10     | 10     | 10         | 10     | 10       |
| TCR constant               | 10    | 12     | 10     | 11         | 9      | 19       |
| TCR variable               | 103   | 122    | 95     | 126        | 104    | 252      |
| IG constant                | 15    | 20     | 10     | 7          | 6      | 14       |
| IG variable                | 289   | 226    | 98     | 145        | 121    | 118      |
| MHC I                      | 19    | 17     | 5      | 7          | 3      | 6        |
| MHC II                     | 16    | 23     | 7      | 14         | 8      | 5        |
| MHC III                    | 37    | 37     | 41     | 32         | 34     | 58       |
| Ext. MHC & framework genes | 27    | 28     | 31     | 25         | 32     | 20       |
| NKC                        | 17    | 17     | 11     | 11         | 17     | 122      |
| LRC                        | 25    | 60     | 32     | 49         | 38     | 4        |
| Extended LRC               | 6     | 24     | 9      | 15         | 11     | 11       |
| Cytokines                  | 83    | 76     | 76     | 68         | 70     | 49       |
| Total                      | 657   | 672    | 435    | 520        | 463    | 678      |

167

168 Table 2 legend. Includes complete and partial gene sequences. A more detailed comparison of

169 immune genes annotated in this study, with those identified in other marsupials and humans is

170 available in Supplementary Table 2 within Additional file 2.

171 Overall, the immune gene repertoire of the koala, woylie, wombat, antechinus, and numbat was

172 similar to other marsupials [50, 76], with marsupial-specific genes and eutherian orthologs identified.

173 Relatively conserved immune genes such as TLRs and constant regions of TCR and IG, as well as

174 polymorphic genes such as MHC and NK receptors, were identified in all five species. Numerous koala

175 immune gene sequences have been characterised previously due to their involvement in chlamydiosis

176 and koala retrovirus which threaten populations [48]. These include MHC [49, 77-79], IG [50], TCR  
177 [49], NK receptors [51] and selected cytokines [50, 80-83] (Supplementary Table S2 in Additional file  
178 2). We mapped the location of these genes within the current version of the genome, and identified  
179 additional new sequences within the LRC, IG and cytokine families (Table 2, Supplementary Table S2  
180 in Additional file 2). Immune genes unique to the marsupial lineage were also characterised in the five  
181 species studied here. These included MHC class II genes DA, DB and DC, TLR1/6 and TCR $\mu$ . Large  
182 marsupial-specific gene expansions within the LRC NK receptors were characterised in all five species,  
183 as well as reduced gene content within the NKC cluster of NK receptors. Consistent with other  
184 marsupials investigated to date Ig $\delta$  was not found in any of the five assemblies [84]. A detailed outline  
185 of immune genes annotated in this study compared to those of other marsupials and humans is  
186 provided in Supplementary Table S2 within Additional file 2.

### 187 Automated versus manual immune gene annotation

188 For woylie, wombat, antechinus, numbat, and platypus genomes, we assessed how well our manual  
189 immune gene annotation aligned with automated annotations by Fgenesh++ (woylie, antechinus, and  
190 numbat), MAKER (wombat) and the NCBI pipeline (platypus). The koala was not included in the  
191 comparison as the genome available on DNazoo  
192 ([https://www.dnazoo.org/assemblies/Phascolarctos\\_cinereus](https://www.dnazoo.org/assemblies/Phascolarctos_cinereus)) has not been annotated. Inclusion of  
193 the platypus NCBI annotation ensures that any differences in automated and manual immune gene  
194 annotation are not due to deficiencies within the Fgenesh++ annotation pipeline, as the woylie,  
195 antechinus and numbat genomes were all annotated with Fgenesh++ using the same parameters.

196 Automated annotation pipelines failed to characterise the complete immune repertoire of the  
197 platypus or any of the four marsupial species (Figure 1). Only 24.65%, 21.32%, 21.32%, 29.66%, 30.97%  
198 of immune genes were correctly annotated by the automated pipeline in platypus, woylie, wombat,  
199 antechinus, and numbat respectively, defined as  $\geq 90\%$  overlap in genomic coordinates of immune  
200 genes between our manual annotations and the automated annotations (Figure 1). Interestingly, more

201 immune genes were correctly annotated by the automated software in the low-quality wombat,  
202 antechinus, and numbat genomes than the high-quality platypus and woylie genomes. This inverse  
203 relationship between genome quality and proportion of correctly annotated immune genes is likely  
204 related to the characterisation of additional divergent and polymorphic genes such as MHC class I and  
205 II in woylie and platypus, which could not be identified by automated or manual annotation in the  
206 wombat, antechinus, and numbat due to genome fragmentation (Table 3). The platypus and all four  
207 marsupial genomes displayed a high proportion of immune genes which were very poorly annotated  
208 by automated pipelines ( $\leq 10\%$  overlap between immune gene coordinates from manual versus  
209 automated annotation); 34.48%, 47.46%, 69.98%, 31.79% and 31.17% for platypus, woylie, wombat,  
210 antechinus, and numbat respectively (Figure 1). Most of these genes comprised immunoglobulin and  
211 T cell receptor variable gene segments, and species-specific gene expansions in NKC and LRC families,  
212 indicating the difficulty in automated annotation of these regions (Figure 3).

213 Figure 1. Percentage overlap of genomic coordinates between manual and automated annotations of  
214 immune genes in five genomes.

215 Figure 1 legend. Colours indicate proportion of immune genes with 0 to 100% overlap between manual  
216 and automated annotations, with 0 indicating manually annotated genes with no overlap of genomic  
217 coordinates with the automated annotation.

## 218 Relationship between genome quality and manual immune gene annotation

219 Manual annotation of immune genes across the koala, woylie, wombat, antechinus and numbat  
220 genomes, and mapping of previous annotations to the new platypus genome, highlighted a clear  
221 relationship between immune gene fragmentation and genome quality (Figure 2). Overall, the high-  
222 quality koala, platypus and woylie genomes all contained complete immune gene family clusters,  
223 which were highly fragmented in the lower quality wombat, antechinus, and numbat genomes.  
224 Fragmentation was particularly evident within families which contain genes that do not share  
225 orthology to those in eutherians, such as LRC NK receptors and TCR $\mu$ , and highly duplicated families

226 such as MHC (Figure 3). To investigate this relationship further, we calculated the number of scaffolds  
227 which encoded 50% (L50) and 90% (L90) of manually annotated immune genes in each of the five  
228 species studied (Figure 2).

229 Figure 2. L50 and L90 immune gene metric for six genomes, compared to  $\log_{10}$  contig N50.

230 The platypus, koala and woylie had an L90 of 10, 9 and 36 respectively, which suggests immune gene  
231 families were highly contiguous within all three genomes (Figure 2). Complete coding sequences were  
232 identified for 98% and 95% of immune genes in koala and woylie respectively. In addition, 90% of  
233 annotated immune genes were located on scaffolds greater than 33.3 Mbp, 75 Mbp and 1 Mbp in  
234 platypus, koala, and woylie respectively. Complex multi-gene immune families such as MHC, NK  
235 receptors and TCR were highly intact in all three species. The koala and woylie MHC regions were both  
236 located on a single scaffold (Figure 3). Class I and II genes were interspersed, and flanked by class III,  
237 framework and extended class I and II gene clusters, which reflected the MHC organisation of other  
238 marsupials (Figure 3) [49, 85]. Unlike marsupials, the platypus MHC is encoded within a  
239 pseudoautosomal region of two sex chromosomes. MHC class I and II genes were interspersed in a  
240 single cluster on chromosome X3, and class III, extended class I and II, and framework genes located  
241 in a single cluster on chromosome X5 (Figure 3) [33]. Large gene expansions within the LRC NK  
242 receptors were encoded on a single scaffold in koala and six scaffolds in woylie (Figure 3). The number  
243 and type of monotreme NK receptor genes differs to marsupials, as they have a large expansion within  
244 the NKC gene cluster and reduction within the LRC gene cluster [66]. More than 80% of platypus NKC  
245 genes were located in a single cluster on chromosome 17, with LRC genes located on 5 different  
246 chromosomes [66]. Fragmentation of the LRC cluster is not a factor of genome quality but reflects the  
247 evolutionary history of this immune family [66]. The four TCR loci ( $\alpha/\delta$ ,  $\beta$ ,  $\gamma$  and  $\mu$ ) were encoded in  
248 single clusters on three chromosomes in platypus and single scaffolds in koala. The TCR loci were  
249 fragmented across up to three scaffolds in woylie. This includes genes known to flank these loci in

250 other marsupials, which enabled resolution of TCR locus organisation in these species, and confirmed  
251 gene synteny across marsupials, human and mouse as identified previously [85].

252 Figure 3. Genomic organisation and gene content of the LRC (A) and MHC region (B) in five genomes.

253 Figure 3 legend. The number of genes within each cluster are given, as well as scaffold counts of  
254 orphan genes (genes on single scaffolds). In A, LRC genes are purple, extended LRC genes are teal. In  
255 B, MHC class I genes are red, class II blue, class III green, extended class I pink, extended class II yellow  
256 and framework genes orange. Large distances between genes are given below the scaffold, otherwise  
257 the distance between genes and/or clusters was within the expected range for each family. Figure  
258 created with BioRender.com.

259 Fragmentation of immune genes in the wombat genome differed between immune families, with an  
260 L90 of 56 (Figure 2). 22% of scaffolds encoding immune genes were shorter than 100Kb and partial  
261 coding sequences were identified for 7% of annotated immune genes. The MHC region was relatively  
262 contiguous in the wombat, with 92% of genes encoded on a single scaffold (Figure 3). Although, a  
263 number of MHC genes were encoded as orphan genes to the main MHC cluster, indicating this family  
264 is misassembled in the wombat genome. In addition, some MHC genes could not be identified in the  
265 wombat genome, while only single copies could be identified for others which are known to be  
266 duplicated in all other marsupials studied to date (Additional file 2). While this reduced MHC gene  
267 content in the wombat may reflect the true MHC gene repertoire of this species, it is likely MHC genes  
268 could not be annotated due to assembly error. The LRC cluster was highly fragmented across 16  
269 scaffolds (Figure 3), of which more than 80% encoded a single gene and were less than 10kb in length.  
270 Extended LRC and LRC genes were interspersed, likely due to mis-assembly of the region as these  
271 genes should be located in separate clusters as observed in koala and woylie (Figure 3). TCR $\alpha$ ,  $\beta$  and  $\gamma$   
272 loci were encoded on individual scaffolds, however TCR $\mu$  was fragmented across 10 scaffolds, with  
273 34% of genes located on individual scaffolds of less than 15Kb. While the TCR $\beta$  locus was encoded in

274 a single cluster in the wombat, half of the locus was in the reverse orientation. This organisation is  
275 unusual amongst mammalian TCR and is likely a result of the HiC scaffolding.

276 Immune gene families were highly fragmented in the antechinus and numbat genomes, with an L90  
277 of 156 and 218 respectively (Figure 2). 29% and 43% of immune genes were located on scaffolds less  
278 than 100Kb, and partial coding sequences were identified for 5.7% and 10.8% of immune genes, in  
279 antechinus and numbat respectively. Complex multi-gene families such as MHC, NK receptors and TCR  
280 were highly fragmented, with individual genes or exons located on short scaffolds. While 86% of MHC  
281 genes were located on a single scaffold in antechinus (Figure 3), genome fragmentation prevented the  
282 identification of additional MHC genes, hence the true MHC gene content could not be determined.  
283 The numbat MHC region was highly fragmented across 52 scaffolds, 63% of which were less than  
284 100Kb in length (Figure 3). Large gene expansions of LRC NK receptors were fragmented across 34  
285 scaffolds in antechinus and numbat, of which 67% (antechinus) and 35% (numbat) were less than  
286 10Kb, and 76% of scaffolds encoded individual LRC genes in both species (Figure 3). Similar to wombat,  
287 extended LRC and LRC genes were interspersed, likely a mis-assembly as these genes should be  
288 encoded within separate clusters as observed in koala and woylie. All four TCR loci were fragmented  
289 in numbat, and all except TCR $\alpha$  in antechinus, with individual loci encoded across up to 6 scaffolds in  
290 numbat and 19 in antechinus. Low contiguity within genomic regions encoding immune gene families  
291 in the antechinus and numbat limited investigation of genomic organisation, synteny and evolution in  
292 these species.

## 293 Discussion

294 By manually annotating immune genes in five marsupial and one monotreme genome of varying  
295 qualities, we have confirmed that genome quality is directly linked to our ability to annotate complex  
296 immune gene families. Without long reads and scaffolding technologies, immune genes are scattered  
297 across many individual scaffolds and gene family organisation and evolution cannot be elucidated. We



298 conclude that a kitchen sink approach, that uses long-read data combined with HiC technology, to  
299 generate a high-quality genome assembly is required to investigate immunity and disease in wildlife.

300 The immune gene repertoire of the koala, woylie, wombat, antechinus and numbat was similar to  
301 other marsupials such as Tasmanian devil [38, 41, 45], tammar wallaby (*Macropus eugenii*) [68, 86-89]  
302 and grey short-tailed opossum (*Monodelphis domestica*) [76]. The platypus immune gene repertoire  
303 has been characterised previously [33], and we identified their location within the current genome  
304 assembly. Fewer MHC genes were identified in the wombat, antechinus, and numbat, compared to  
305 the platypus, koala, and woylie (Table 2, Supplementary Table S2 in Additional file 2). This is likely due  
306 to poor read assembly within this highly variable and duplicated region of the genome, rather than a  
307 true reduction in MHC gene content within these three species. The assembly of a complete MHC  
308 cluster in the platypus, koala and woylie is due to the ability of long reads to span duplicated and  
309 variable sequences, which enables assembly algorithms to accurately reconstruct this complex region  
310 of the genome.

### 311 **Automated annotation poorly characterises immune genes in non-model species**

312 Despite mammalian BUSCOv5 scores of up to 94.1% amongst the six genomes in this study, indicating  
313 that the genomes were “functionally complete”, on average 42% of immune genes were not  
314 accurately annotated and up to 61% of genes were not annotated by the automated software  
315 Fgenesh++ and MAKER, nor the NCBI pipeline, compared to our manual annotations (Figure 3). The  
316 majority of immune genes incorrectly annotated or missing from the automated annotations were  
317 variable segments of TCR and IG, or divergent genes such as MHC with low or no BLAST homology to  
318 nucleotide or protein databases. Gene models generated by automated annotation software are  
319 hypotheses based on supporting evidence such as RNAseq data, which was used as evidence for the  
320 automated annotation in the four marsupial and platypus genomes. While immune transcripts were  
321 identified in the transcriptomes from these species, RNAseq data did not provide enough evidence to  
322 support gene models for ~40% of immune genes within the genome. Some immune genes may not

323 have been expressed in the tissue sequenced, were expressed at low levels, or were fragmented. For  
324 human and mouse, comprehensive and curated gene sets such as GENCODE and RefSeq are available  
325 to guide gene model predictions, comprising data from more than 10,000 RNA experiments and  
326 decades of dedicated work in this field [90, 91]. Given time, budget and sample constraints for wildlife,  
327 these curated gene sets are not available, hence RNAseq evidence is incomplete resulting in deficient  
328 gene models by automated annotation software.

329 It is not surprising that TCR and IG V segments were not automatically annotated in the genomes in  
330 this study. These genes are notoriously difficult to characterise and are manually annotated in the  
331 human and mouse genome on Ensembl using the International Immunogenetics Information System  
332 (IMGT) database [30, 92]. Alignment of mature IG and TCR sequences from RNAseq data to the  
333 genome results in poor automated annotation, as V segments utilize different sequence signal splice  
334 sites to introns, which are not recognized by the open reading frame prediction algorithms. V  
335 sequences from three marsupials and two monotremes are available in IMGT, however as non-model  
336 species, they are not included in the scope for manual annotation by Ensembl or NCBI, so these  
337 important functional features are not annotated.

338 Our results highlight the importance of manual annotation of complex and variable immune genes,  
339 and caution reliance on BUSCO metrics to assess functional completeness of a genome. If this pattern  
340 is observed more widely across non-model species and other complex gene families, functionally  
341 important genes may not be accurately represented in genome annotations, which will flow on to  
342 downstream applications [28, 93]. While automated annotation is required to keep pace with the  
343 rapid sequencing of genome assemblies, manual gene characterisation is still the gold standard for  
344 genome annotation [90] and is conducted for the human, mouse, zebrafish and rat genomes on  
345 Ensembl [94]. For non-model species, manual annotation is conducted by individual research groups  
346 following genome assembly accession with NCBI or Ensembl, which conduct in-house automated  
347 annotation for some but not all species [95, 96]. These highly valuable manual gene annotations are

348 not incorporated into the Ensembl annotation release but are often listed in the supplementary  
349 materials of multiple individual publications. NCBI does have some capacity to incorporate manual  
350 changes to existing annotation records [97]. Changes to multiple annotations, such as adding new  
351 genes as is the case in this study, require the genome to be re-annotated, which is not feasible for all  
352 research groups. In addition, it is not a requirement for manual changes to annotations to be tracked  
353 between genome versions, hence this information could easily be lost. Given NCBI and Ensembl  
354 annotations are widely used by the scientific community, these institutions should consider  
355 incorporating manual gene annotations into the annotation record or provide scope for permanently  
356 storing this valuable data alongside the respective assembly.

### 357 **Genome quality correlates with immune gene fragmentation**

358 As expected, we found that genome quality directly correlates with likelihood that an immune gene  
359 family was assembled and annotated correctly. Immune genes fragment as genome quality declines  
360 (Figure 2 and 3). This highlights the importance of long reads and HiC scaffolding to re-assemble  
361 complex gene families (platypus, koala, woylie), which are poorly assembled in short read and linked-  
362 read assemblies (wombat, antechinus, numbat). Figure 4 provides a graphical representation of the  
363 impact of different sequencing technologies on the assembly and fragmentation of immune gene  
364 clusters. When the average read or contig length is shorter than the gene length, the assembly  
365 algorithm is unable to reconstruct genes, which are fragmented across multiple short contigs [93]. The  
366 average immune gene in this study was ~10 kbp in length. Long reads greater than 10 kbp in the  
367 platypus, koala and woylie genomes were able to span these genes, whereas the ~150 bp short reads  
368 in the wombat, antechinus and numbat genomes were insufficient to re-assemble the entire gene,  
369 resulting in gene fragments on short scaffolds. Gene families with copy number variation such as MHC  
370 and NK receptors are notoriously difficult to assemble and annotate [18, 21], so it is not surprising  
371 these gene families were highly fragmented in the antechinus and numbat genomes. Gene copies  
372 within these families can contain almost identical domains, may be pseudogenes and are encoded in  
373 clusters within the genome [28]. For example, koala NK LRC genes share up to 96% amino acid

374 sequence identity and are encoded within a single cluster. For these reasons, assembly and annotation  
375 of MHC and NK receptors have been used to illustrate improvements in assembly quality. For example,  
376 MHC class I genes were located on a single contig in a recent release of the human genome [21],  
377 however the highly repetitive MHC class II locus remains unresolved [21].

378 Figure 4. Impact of different sequencing technologies on the assembly of immune gene clusters such  
379 as the MHC.

380 Figure 4 legend. The impact of long-read (A – platypus, koala and woylie), short-read (B – wombat)  
381 and 10x Chromium linked read (C – antechinus and numbat) sequencing technologies, alone or in  
382 combination with HiC scaffolding (i – koala & platypus, and ii – wombat), on the assembly of complex  
383 and repetitive immune gene clusters such as the MHC. Colour gradient represents gene orientation  
384 (A) Long read sequencing generates reads which span complex and repetitive sequences, resulting in  
385 long contigs and scaffolds which contain multiple immune genes with complete coding sequences. (B)  
386 Short-read sequencing generated reads which are unable to span immune genes, hence reads are  
387 assembled into multiple short contigs which end when the algorithm is unable to assemble a repetitive  
388 and complex immune gene sequence. (C) In linked-read sequencing, individual DNA molecules are  
389 partitioned into gel beads and identical barcodes attached, then sequenced using short-read  
390 technology resulting in read clouds [98]. As no individual read within the cloud spans the entire length  
391 of the DNA molecule, the algorithm is unable to assemble repetitive and complex sequences, resulting  
392 in multiple short contigs similar to a short-read assembly. Short contigs in B and C result in  
393 fragmentation of immune genes, leading to false pseudogenization and “missing” genes. (i) HiC  
394 sequencing provides contact information for DNA sequences located in close proximity within the  
395 nucleus, as frequency decreases with increasing linear distance within the genome assembly [99]. This  
396 contact information can be used to cluster, order and orient contigs into chromosome-size scaffolds  
397 [100]. Long contigs scaffolded with HiC result in near-complete reconstruction of immune gene  
398 clusters. (ii) Short contigs scaffolded with HiC generates what appears to be long scaffolds, however

399 complex immune gene clusters are incomplete. As multiple HiC contacts can span the length of the  
400 contig, the correct contig orientation is not apparent leading to inversions and mis-placed contigs  
401 during scaffolding. This leads to incorrect orientation of genes, which can cause pseudogenization  
402 and/or gene fragmentation. Manual immune gene annotation reveals that the true gene complement  
403 of the immune cluster is not contained within the scaffolded sequence. Figure created with  
404 BioRender.com.

405 HiC scaffolding of contigs derived from platypus and koala long reads resulted in complete and  
406 accurate reassembly of immune gene clusters in both genomes (Figure 4 A). Conversely, HiC  
407 scaffolding of contigs from wombat short reads resulted in immune gene fragmentation (Figure 4 B),  
408 reflected in the high immune gene L90 for the wombat genome (Figure 2). Both the koala and wombat  
409 genomes were scaffolded with DNazoo HiC data using the same 3D-DNA pipeline [57, 58, 101]. This  
410 result underscores the importance of assessing annotations when determining genome quality, as the  
411 wombat genome is classified as chromosome-length yet is highly fragmented within functionally  
412 important genomic regions. Input genome assembly contiguity is known to influence HiC scaffolding  
413 ordering and orientation errors [102], despite claims that HiC scaffolding with 3D-DNA generates  
414 chromosome-length scaffolds from US\$1,000 short read contigs [57]. Problems with HiC scaffolding  
415 within repetitive and duplicated regions are well documented [23, 102, 103], which is exacerbated by  
416 short contigs [102]. Modelling of human genome scaffolding performance using 3D-DNA revealed  
417 scaffold chimeras, ordering and orientation errors increased as contig length decreased [102]. While  
418 the koala and platypus genomes used as input to HiC scaffolding benefited from polishing with short  
419 read data and optical mapping [49], HiC scaffolding is insufficient to recover the majority of immune  
420 clusters from a fragmented genome.

421 The 3D-DNA pipeline orientates contigs within scaffolds by maximizing contact frequency between  
422 contig ends [58]. Short contigs, such as those from the wombat, would have multiple contacts that  
423 span the length of the contig. This means both true and false contig orientations would have a similar

424 frequency, resulting in errors such as the partial inversion of the TCRB locus which is likely false  
425 (Additional file 2). At a gene level, these errors lead to the misplacement of genes on short scaffolds  
426 outside the main immune cluster and false pseudogenisation (Figure 4 B). Long contigs, such as those  
427 from the koala, would have fewer contacts that span the length of the contig, hence the true  
428 orientation of the contig would be clear from the higher contact frequency at the correct joining end.  
429 The combination of long contigs which span repetitive and highly heterozygous regions with HiC  
430 scaffolding maximizes contiguity within immune gene clusters (Figure 4 A).

431 10x Chromium linked-read sequencing was insufficient to accurately re-assemble immune gene  
432 clusters in our study (Figure 4 C). Complete marsupial immune gene clusters can span hundreds of  
433 kilobases to megabases, as shown by annotation of the complete MHC, NK receptor and TCR regions  
434 in the koala (Additional file 2). DNA molecules input to 10x library preparation were on average 74  
435 kbp and 23 kbp in antechinus and numbat respectively. For most immune gene clusters, these  
436 molecules would not span an entire cluster, nor even multiple immune genes in the case of the  
437 numbat. This is reflected in our results, where smaller immune clusters such as the 70 kbp TRG locus  
438 were intact in the antechinus, while no cluster was intact in the numbat. Interestingly, the antechinus  
439 MHC cluster appears to be intact (Figure 3), however manual annotation revealed multiple genes were  
440 “missing” within the scaffold and instead were located on individual short scaffolds. Even in humans,  
441 10x linked reads are unable to resolve repetitive sequences which are larger than the input DNA  
442 molecule [104]. Molecule length is influenced by input DNA quality [105], which was >40 kbp for both  
443 antechinus [60] and numbat. DNA from human blood and cell lines routinely achieve molecule lengths  
444 greater than 100 Mbp [106]. Given the challenges surrounding sampling of wildlife, this outcome  
445 would be unlikely for many wildlife genomics projects using 10x linked read sequencing.

446 Regardless of input DNA molecule length, 10x libraries are still subject to the limitations of short-read  
447 sequencing regarding assembly of complex sequences. Antechinus and numbat 10x libraries were  
448 sequenced as short ~150 bp reads, hence while reads can be assigned back to the corresponding input

449 DNA molecule, no single read spans the molecule length. Gaps between the reads make *de novo*  
450 assembly of repetitive and complex immune sequences difficult, often resulting in termination of  
451 contig extension and gene fragments scattered across short scaffolds [104, 107, 108]. These gene  
452 fragments can be misinterpreted as pseudogenes owing to loss of up/downstream coding regions  
453 (Figure 4C). For example, antechinus and numbat NK LRC genes share up to 97% and 98% amino acid  
454 sequence identity amongst the 91 and 70 immunoglobulin superfamily (IGSF) domains identified in  
455 each species respectively. The LRC should be encoded within a single cluster, as in the koala genome  
456 (Figure 3). Instead, the antechinus and numbat LRC clusters are fragmented across 33 and 34 scaffolds  
457 respectively.

458 As the global biodiversity crisis deepens, the need to sequence eukaryotic life while it remains is  
459 imperative [1, 7, 8]. High quality genomes, using a combination of long-read and HiC, have recently  
460 been generated for a number of wildlife species [8], which have been used to answer questions  
461 involving chromosome evolution [109], comparative genomics [110] and runs of homozygosity [111]  
462 amongst others. Our results show that high-quality genomes are also necessary to study immune  
463 genes in wildlife.

464 Draft quality *de novo* genomes, in this study the antechinus and numbat (linked reads), have limited  
465 capacity for usefully informing immunogenetics studies as only partial sequences will be identified for  
466 most immune genes. A scaffold-quality genome, in this study the woylie (long-reads) or wombat  
467 (short-reads with HiC), would be suitable for immune marker development targeting most immune  
468 gene families, and studying TCR and IG diversity. Long-reads will provide contiguity within duplicated  
469 MHC and NK families, which should reassemble into complete clusters. HiC data may resolve some  
470 immune gene clusters from a short-read assembly, however, may introduce errors as discussed  
471 earlier. Finally, the kitchen sink approach, in this study the platypus and koala genomes (multiple data  
472 types), will accurately assemble immune gene clusters, which is essential for investigating genomic  
473 organisation, synteny and evolution. In the context of wildlife disease, it may be necessary to wait for

474 an opportunistic sample from an individual that is euthanised, or acquire ethics to euthanise an  
475 individual, in order to obtain sufficient sample quantity and quality to generate high-quality  
476 chromosome-length genome assemblies and associated transcriptomes [7, 9, 112-114].

## 477 **Potential implications**

478 The biodiversity crisis and increasing impact of wildlife disease on animal and human health provides  
479 impetus for studying immune genes in wildlife. Genomes are now available for many wildlife species,  
480 however utility of these assemblies for annotating complex immune gene families is unknown. We  
481 have provided an assessment of complex immune gene annotation across genomes of varying quality,  
482 using immune genes in five marsupials and one monotreme as an example. Genome quality directly  
483 influenced the reassembly of immune gene clusters, and ability to investigate evolution, organisation,  
484 and true gene content of the immune repertoire. A high-quality genome generated from long-reads  
485 with HiC accurately assembles immune gene clusters. However, draft-quality genomes generated  
486 from short-reads with HiC or 10x Chromium linked-reads were unable to achieve this. Aside from  
487 genome quality, manual annotation of immune genes is required to cover the shortfall in deficient  
488 gene models used by automated annotation software. Our results highlight the limitations of different  
489 sequencing technologies and established workflows for genome annotation and quality assessment,  
490 when applied to non-model species and the investigation of wildlife disease and immunity.

## 491 **Methods**

492 Five published marsupial genomes, koala [49, 57, 58], woylie [59], wombat [57], antechinus [60] and  
493 numbat [61] (Table 1), and one monotreme genome, platypus [33], were selected for this study based  
494 on use of different sequencing technologies (alone and in combination) and variation in assembly  
495 quality. These include assemblies generated using multiple data types (koala and platypus), long and  
496 short-reads (woylie), short-reads and HiC (wombat) or 10x Chromium linked-reads (antechinus and  
497 numbat). BUSCO scores were generated by uploading the six genome assemblies to the Galaxy web



498 platform [115], where the public server at galaxy.org was used to run BUSCOv5.2.2 [27] against the  
499 mammalian database.

500 Immune genes were annotated in the koala (phaCin\_unsw\_v4.1\_HiC) [49, 57, 58], antechinus  
501 (anrechinusM\_pseudohap2.1) [60], woylie (mBetpen1.pri.20210916) [59], wombat (vu-2k) [57, 58]  
502 and numbat genome (mMyrfas1.pri.20210917) [61] using multiple search strategies. BLAST was used  
503 to search genome assemblies, associated annotation files and/or transcriptomes using published  
504 marsupial, monotreme and eutherian immune gene sequences as queries, with default parameters  
505 and an e-value threshold of 10 so as not to exclude any potential gene candidates. HMMERv3.2 [116]  
506 was also used to identify putative genes within immune families that are known to contain  
507 duplications in other marsupials, such as NK receptors. Hidden markov models (HMM) were  
508 constructed using ClustalW alignments of published marsupial and eutherian immune gene sequences  
509 constructed in BioEditv7.2.5 [117], which were then used to search all genomes and transcriptomes  
510 using HMMER v3.2 with an e-value threshold of 10. For variable segments of T cell receptor and  
511 Immunoglobulin families, recombination signal sequences (RSS) downloaded from the IMGT database  
512 [92] and published koala sequences [49], were aligned using ClustalW in BioEditv7.2.5 [117] and used  
513 to construct HMM. These RSS HMM were then used to search each genome using HMMERv3.2 [116],  
514 to identify conserved RSS which flank each variable segment. For NK receptors, putative NKC and LRC  
515 sequences from BLAST+v2.7.1 [62] and HMMERv3.2 [116] searches were queried against the swissprot  
516 nonredundant database, and any sequences with top hits to swissprot NK genes, marsupial-specific  
517 NK genes or the protein families database (Pfam) [118] immunoglobulin domain PF00047 or C-type  
518 lectin domain PF00059 HMM model were retained. IGSF domains within putative NK sequences from  
519 each species were identified using the simple modular architecture research tool (SMART) database  
520 [119], and IGSF domains within 5 kbp were considered exons of a single LRC gene. Putative immune  
521 genes were named following the appropriate nomenclature for each family, with duplicated genes  
522 named according to their genomic location from the 5' to 3' end of the locus. For each immune gene  
523 family, amino acid sequences from all five species, in addition to other marsupial, monotreme and

524 eutherian sequences, were aligned using ClustalW in BioEditv7.2.5 [117]. This alignment was then  
525 used to construct neighbour-joining phylogenetic trees in MEGAXv10.2.4 [120] using the p-distance  
526 method, pairwise deletion and 1000 bootstrap replicates.

## 527 **Additional files**

528 File name: Additional file 1

529 File format: .xls

530 Title of data: Supplementary Table S1

531 Description of data: Genomic coordinates of manually annotated immune genes in the koala, woylie,  
532 wombat, antechinus and numbat genomes. The genomic coordinates of published platypus immune  
533 genes used in this study are also included.

534 File name: Additional file 2

535 File format: .doc

536 Title of data: Supplementary results

537 Description of data: A comprehensive comparison of manually annotated immune genes in this  
538 study to those in other marsupials and humans is provided in Supplementary Table 2. For each  
539 immune gene family characterised in this study, a summary of results and phylogenetic analysis is  
540 provided. This includes genes encoding toll-like receptors, natural killer receptors, cytokines  
541 (interferons, interleukins and tumour necrosis factors), T cell receptor constant and variable regions  
542 (all five chains in marsupials and monotremes), immunoglobulin constant and variable regions  
543 (heavy and light chains) and major histocompatibility complex class I, II and III genes. Additional file 2  
544 contains 7 tables and 14 figures.

## 545 Data availability

546 The published woylie and numbat genome and global transcriptome assemblies are available through  
547 Amazon Web Services Open Datasets Program [https://registry.opendata.aws/australasian-](https://registry.opendata.aws/australasian-genomics/)  
548 [genomics/](https://registry.opendata.aws/australasian-genomics/), NCBI under BioProject accession PRJNA763700 and GigaDB for woylie and PRJNA786364  
549 and GigaDB [121] for numbat. The published koala genome assembly and annotation  
550 (phaCin\_unsw\_v4.1\_HiC.fasta) are available from the DNazoo website  
551 [https://www.dnazoo.org/assemblies/Phascolarctos\\_cinereus](https://www.dnazoo.org/assemblies/Phascolarctos_cinereus). The published wombat genome  
552 assembly and annotation (vu-2k.fasta) are also available from the DNazoo website  
553 [https://www.dnazoo.org/assemblies/Vombatus\\_ursinus](https://www.dnazoo.org/assemblies/Vombatus_ursinus). The published antechinus genome  
554 assembly and annotation (anrechinusM\_pseudohap2.1.fasta) are available from NCBI under  
555 BioProject accession PRJNA664282 and GigaDB [122], and published platypus genome assembly and  
556 annotation (mOrnAna1.pri.v4) under BioProject accession PRJNA489114. Genomic coordinates for all  
557 immune gene sequences annotated in this study are available in Additional file 1. Supporting  
558 information for this study is available in Additional file 2.

## 559 Declarations

### 560 List of abbreviations

561 Bacterial artificial chromosome (BAC), basic local alignment search tool (BLAST), benchmarking single  
562 copy gene orthologs (BUSCO), complementary DNA (cDNA), devil facial tumour disease (DFTD), giga-  
563 base-pair (Gpb), high-throughput chromosome conformation capture (HiC), hidden markov model  
564 (HMM), immunoglobulin (IG), immunoglobulin superfamily (IGSF), interferon (IFN), international  
565 immunogenetic information system (IMGT), kilo-base-pair (kbp), leukocyte receptor complex (LRC),  
566 major histocompatibility complex (MHC), mega-base-pair (Mbp), National Center for Biotechnology  
567 Information (NCBI), natural killer complex (NKC), natural killer receptor (NK), Pacific Biosciences  
568 (PacBio), protein families database (Pfam), recombination signal sequence (RSS), simple modular

569 architecture research tool (SMART), single nucleotide polymorphisms (SNPs), T cell receptor (TCR)  
570 and toll-like receptor (TLR).

#### 571 **Consent for publication**

572 Not applicable

#### 573 **Competing interests**

574 The authors declare that they have no competing interests

#### 575 **Funding**

576 This work has been funded by the Australian Research Council Centre of Excellence for Innovations in  
577 Peptide and Protein Science (CE200100012) and Discovery Project (DP180102465). LS was supported  
578 by LP180100244 and PB was supported by an Australian Postgraduate award. YZ is supported by the  
579 China Scholarship Council.

#### 580 **Authors' contributions**

581 LS assembled and annotated the woylie genome and transcriptomes, PB assembled and annotated  
582 the numbat genome and transcriptomes, EP assisted with both. EP, PB, LS, YC and YZ annotated  
583 immune genes. KB, CJH and EP designed the study. EP drafted the manuscript, all authors read and  
584 commented on drafts of the manuscript and have approved the submission.

#### 585 **Acknowledgements**

586 The authors would also like to acknowledge the generous contribution of the Presbyterian Ladies'  
587 College Sydney and Bioplatforms Australia.

#### 588 **References**

- 589 1. Diaz S, Settle J, Brondizio ES, Ngo HT, Gueze M, Agard J, et al. *IPBES (2019): Summary for*  
590 *policymakers of the global assessment report on biodiversity and ecosystem services of the*  
591 *Intergovernmental Science-Policy Platform on Biodiversity and Ecosystem Services*. 2019.  
592 Bonn, Germany.
- 593 2. Scheele BC, Pasmans F, Skerratt LF, Berger L, Martel A, Beukema W, et al. Amphibian fungal  
594 panzootic causes catastrophic and ongoing loss of biodiversity. *Science*. 2019;363  
595 6434:1459. doi:10.1126/science.aav0379.
- 596 3. Hoyt JR, Kilpatrick AM and Langwig KE. Ecology and impacts of white-nose syndrome on  
597 bats. *Nature Reviews Microbiology*. 2021;19 3:196-210. doi:10.1038/s41579-020-00493-5.
- 598 4. Woods GM, Lyons AB and Bettiol SS. A Devil of a Transmissible Cancer. *Tropical Medicine*  
599 *and Infectious Disease*. 2020;5 2:50.

- 600 5. Rohr JR, Civitello DJ, Halliday FW, Hudson PJ, Lafferty KD, Wood CL, et al. Towards common  
601 ground in the biodiversity–disease debate. *Nature Ecology & Evolution*. 2020;4 1:24–33.  
602 doi:10.1038/s41559-019-1060-6.
- 603 6. Hohenlohe PA, Funk WC and Rajora OP. Population genomics for wildlife conservation and  
604 management. *Molecular Ecology*. 2021;30 1:62–82. doi:<https://doi.org/10.1111/mec.15720>.
- 605 7. Lewin H, Robinson G, Kress WJ, Baker W, Coddington J, Crandall K, et al. Earth BioGenome  
606 Project: Sequencing life for the future of life. *Proceedings of the National Academy of  
607 Sciences (PNAS)*. 2018;115 17:4325–33. doi:10.1073/pnas.1720115115.
- 608 8. Rhie A, McCarthy SA, Fedrigo O, Damas J, Formenti G, Koren S, et al. Towards complete and  
609 error-free genome assemblies of all vertebrate species. *Nature*. 2021;592 7856:737–46.  
610 doi:10.1038/s41586-021-03451-0.
- 611 9. Teeling EC, Vernes SC, Dávalos LM, Ray DA, Gilbert MTP and Myers E. Bat Biology, Genomes,  
612 and the Bat1K Project: To Generate Chromosome-Level Genomes for All Living Bat Species.  
613 *Annual Review of Animal Biosciences*. 2018;6 1:23–46. doi:10.1146/annurev-animal-022516-  
614 022811.
- 615 10. Zhang G. Bird sequencing project takes off. *Nature*. 2015;522 7554:34–.  
616 doi:10.1038/522034d.
- 617 11. Peterson BK, Weber JN, Kay EH, Fisher HS and Hoekstra HE. Double Digest RADseq: An  
618 Inexpensive Method for De Novo SNP Discovery and Genotyping in Model and Non-Model  
619 Species. *PLOS ONE*. 2012;7 5:e37135. doi:10.1371/journal.pone.0037135.
- 620 12. Sansaloni CP, Petroli CD, Carling J, Hudson CJ, Steane DA, Myburg AA, et al. A high-density  
621 Diversity Arrays Technology (DArT) microarray for genome-wide genotyping in Eucalyptus.  
622 *Plant Methods*. 2010;6 1:16. doi:10.1186/1746-4811-6-16.
- 623 13. McLennan EA, Grueber CE, Wise P, Belov K and Hogg CJ. Mixing genetically differentiated  
624 populations successfully boosts diversity of an endangered carnivore. *Animal Conservation*.  
625 2020;23 6:700–12. doi:<https://doi.org/10.1111/acv.12589>.
- 626 14. Scally A, Yngvadottir B, Xue Y, Ayub Q, Durbin R and Tyler-Smith C. A Genome-Wide Survey  
627 of Genetic Variation in Gorillas Using Reduced Representation Sequencing. *PLOS ONE*.  
628 2013;8 6:e65066. doi:10.1371/journal.pone.0065066.
- 629 15. Robledo-Ruiz DA, Pavlova A, Clarke RH, Magrath MJL, Quin B, Harrison KA, et al. A novel  
630 framework for evaluating in situ breeding management strategies in endangered  
631 populations. *Molecular Ecology Resources*. 2021;n/a n/a doi:[https://doi.org/10.1111/1755-  
632 0998.13476](https://doi.org/10.1111/1755-0998.13476).
- 633 16. Lott MJ, Wright BR, Kemp LF, Johnson RN and Hogg CJ. Genetic Management of Captive and  
634 Reintroduced Bilby Populations. *The Journal of Wildlife Management*. 2020;84 1:20–32.  
635 doi:<https://doi.org/10.1002/jwmg.21777>.
- 636 17. Irving AT, Ahn M, Goh G, Anderson DE and Wang L-F. Lessons from the host defences of  
637 bats, a unique viral reservoir. *Nature*. 2021;589 7842:363–70. doi:10.1038/s41586-020-  
638 03128-0.
- 639 18. Horton R, Wilming L, Rand V, Lovering RC, Bruford EA, Khodiyar VK, et al. Gene map of the  
640 extended human MHC. *Nature Reviews Genetics*. 2004;5 12:889–99. doi:10.1038/nrg1489.
- 641 19. Robinson J, Waller MJ, Parham P, Groot Nd, Bontrop R, Kennedy LJ, et al. IMGT/HLA and  
642 IMGT/MHC: sequence databases for the study of the major histocompatibility complex.  
643 *Nucleic Acids Research*. 2003;31 1:311–4. doi:10.1093/nar/gkg070.
- 644 20. Trowsdale J and Parham P. Mini-review: Defense strategies and immunity-related genes.  
645 *European Journal of Immunology*. 2004;34 1:7–17.  
646 doi:<https://doi.org/10.1002/eji.200324693>.
- 647 21. Jain M, Koren S, Miga KH, Quick J, Rand AC, Sasani TA, et al. Nanopore sequencing and  
648 assembly of a human genome with ultra-long reads. *Nature Biotechnology*. 2018;36 4:338–  
649 45. doi:10.1038/nbt.4060.

- 650 22. Ming L, Wang Z, Yi L, Batmunkh M, Liu T, Siren D, et al. Chromosome-level assembly of wild  
651 Bactrian camel genome reveals organization of immune gene loci. *Molecular Ecology*  
652 *Resources*. 2020;20 3:770-80. doi:<https://doi.org/10.1111/1755-0998.13141>.
- 653 23. Bickhart DM, Rosen BD, Koren S, Sayre BL, Hastie AR, Chan S, et al. Single-molecule  
654 sequencing and chromatin conformation capture enable de novo reference assembly of the  
655 domestic goat genome. *Nature Genetics*. 2017;49 4:643-50. doi:10.1038/ng.3802.
- 656 24. Holt C and Yandell M. MAKER2: an annotation pipeline and genome-database management  
657 tool for second-generation genome projects. *BMC Bioinformatics*. 2011;12 1:491.  
658 doi:10.1186/1471-2105-12-491.
- 659 25. Solovyev V, Kosarev P, Seledsov I and Vorobyev D. Automatic annotation of eukaryotic  
660 genes, pseudogenes and promoters. *Genome Biology*. 2006;7 Suppl 1:S10. doi:10.1186/gb-  
661 2006-7-s1-s10.
- 662 26. Rhie A, McCarthy SA, Fedrigo O, Damas J, Formenti G, Koren S, et al. Towards complete and  
663 error-free genome assemblies of all vertebrate species. Cold Spring Harbor Laboratory, 2020.
- 664 27. Seppey M, Manni M and Zdobnov EM. BUSCO: Assessing Genome Assembly and Annotation  
665 Completeness. In: Kollmar M, editor. *Gene Prediction: Methods and Protocols*. New York,  
666 NY: Springer New York; 2019. p. 227-45.
- 667 28. Mudge JM and Harrow J. The state of play in higher eukaryote gene annotation. *Nature*  
668 *Reviews Genetics*. 2016;17 12:758-72. doi:10.1038/nrg.2016.119.
- 669 29. Guigó R, Flicek P, Abril JF, Reymond A, Lagarde J, Denoeud F, et al. EGASP: the human  
670 ENCODE genome annotation assessment project. *Genome Biology*. 2006;7 Suppl 1:S2.  
671 doi:10.1186/gb-2006-7-s1-s2.
- 672 30. Ensembl: Annotation of immunoglobulin and T cell receptor genes.  
673 [https://m.ensembl.org/info/genome/genebuild/ig\\_tcr.html](https://m.ensembl.org/info/genome/genebuild/ig_tcr.html) (2021). Accessed 19th July 2021.
- 674 31. Hogg CJ, Ottewell K, Latch P, Rossetto M, Biggs J, Gilbert A, et al. Threatened Species  
675 Initiative: Empowering conservation action using genomic resources. *Proceedings of the*  
676 *National Academy of Sciences*. 2022;119 4:e2115643118. doi:10.1073/pnas.2115643118.
- 677 32. Gordon D, Huddleston J, Chaisson Mark JP, Hill Christopher M, Kronenberg Zev N, Munson  
678 Katherine M, et al. Long-read sequence assembly of the gorilla genome. *Science*. 2016;352  
679 6281:aae0344. doi:10.1126/science.aae0344.
- 680 33. Zhou Y, Shearwin-Whyatt L, Li J, Song Z, Hayakawa T, Stevens D, et al. Platypus and echidna  
681 genomes reveal mammalian biology and evolution. *Nature*. 2021; doi:10.1038/s41586-020-  
682 03039-0.
- 683 34. Quigley BL and Timms P. The Koala Immune Response to Chlamydial Infection and Vaccine  
684 Development—Advancing Our Immunological Understanding. *Animals*. 2021;11 2:380.
- 685 35. Madden D, Whaite A, Jones E, Belov K, Timms P and Polkinghorne A. Koala immunology and  
686 infectious diseases: How much can the koala bear? *Developmental & Comparative*  
687 *Immunology*. 2018;82:177-85. doi:<https://doi.org/10.1016/j.dci.2018.01.017>.
- 688 36. Peel E and Belov K. Lessons learnt from the Tasmanian devil facial tumour regarding immune  
689 function in cancer. *Mammalian Genome*. 2018; doi:10.1007/s00335-018-9782-3.
- 690 37. Murchison EP, Schulz-Trieglaff OB, Ning Z, Alexandrow LB, Bauer MJ, Fu B, et al. Genome  
691 sequencing and analysis of the Tasmanian devil and its transmissible cancer. *Cell*.  
692 2012;148:780-91.
- 693 38. Morris B, Cheng Y, Warren W, Papenfuss AT and Belov K. Identification and analysis of  
694 divergent immune gene families within the Tasmanian devil genome. *BMC Genomics*.  
695 2015;16 1.
- 696 39. Murchison EP, Tovar C, Hsu AL, Bender HS, Kheradpour P, Rebbeck CA, et al. The Tasmanian  
697 devil transcriptome reveals schwann cell origins in a clonally transmissible cancer. *Science*.  
698 2010;327:84-7.

- 699 40. Hewaviseni RV, Morris KM, O'Meally D, Cheng Y, Papenfuss AT and Belov K. The  
700 identification of immune genes in the milk transcriptome of the Tasmanian devil (*Sarcophilus*  
701 *harrisii*). PeerJ. 2016;4:1569.
- 702 41. Cheng Y, Stuart A, Morris K, Taylor R, Siddle HV, Deakin JE, et al. Antigen-presenting genes  
703 and genomic copy number variations in the Tasmanian devil MHC. BMC Genomics.  
704 2012;13:87.
- 705 42. Morris KM, Wright B, Grueber CE, Hogg C and Belov K. Lack of genetic diversity across  
706 diverse immune genes in an endangered mammal, the Tasmanian devil (*Sarcophilus harrisii*).  
707 Molecular Ecology. 2015;24:3860-72.
- 708 43. Siddle HV, Kreiss A, Eldridge MDB, Noonan E, Clarke CJ, Pyecroft S, et al. Transmission of a  
709 fatal clonal tumor by biting occurs due to depleted MHC diversity in a threatened  
710 carnivorous marsupial. PNAS. 2007;104 41:16221-6.
- 711 44. Siddle HV, Kreiss A, Tovar C, Yuen CK, Chen Y, Belov K, et al. Reversible epigenetic down-  
712 regulation of MHC molecules by devil facial tumour disease illustrates immune escape by a  
713 contagious cancer. PNAS. 2013;110 13:5103-8.
- 714 45. Siddle HV, Sanderson CE and Belov K. Characterization of major histocompatibility complex  
715 class I and II genes from the Tasmanian devil (*Sarcophilus harrisii*). Immunogenetics.  
716 2007;59:753-60.
- 717 46. Cheng Y, Sanderson CE, Jones M and Belov K. Low MHC class II diversity in the Tasmanian  
718 devil. Immunogenetics. 2012;64:525-33.
- 719 47. Cheng Y, Grueber C, Hogg CJ and Belov K. Improved high-throughput MHC typing for non-  
720 model species using long-read sequencing. Molecular Ecology Resources. 2021;n/a n/a  
721 doi:<https://doi.org/10.1111/1755-0998.13511>.
- 722 48. Quigley BL and Timms P. Helping koalas battle disease – Recent advances in Chlamydia and  
723 koala retrovirus (KoRV) disease understanding and treatment in koalas. FEMS Microbiology  
724 Reviews. 2020; doi:10.1093/femsre/fuaa024.
- 725 49. Johnson RN, O'Meally D, Chen Z, Etherington GJ, Ho SYW, Nash WJ, et al. Adaptation and  
726 conservation insights from the koala genome. Nature Genetics. 2018;50 8:1102-11.  
727 doi:10.1038/s41588-018-0153-5.
- 728 50. Morris K, Prentis PJ, O'Meally D, Pavasovic A, Brown AT, Timms P, et al. The koala  
729 immunological toolkit: sequence identification and comparison of key markers of the koala  
730 (*Phascolarctos cinereus*) immune response. Australian Journal of Zoology. 2014;62:195-9.
- 731 51. Morris KM, Matthew M, Waugh C, Ujvari B, Timms P, Polkinghorne A, et al. Identification,  
732 characterisation and expression analysis of natural killer receptor genes in *Chlamydia*  
733 *pecorum* infected koalas (*Phascolarctos cinereus*). BMC Genomics. 2015;16 1.
- 734 52. Morris KM, O'Meally D, Zaw T, Song X, Gillett A, Molloy MP, et al. Characterisation of the  
735 immune compounds in koala milk using a combined transcriptomic and proteomic approach.  
736 Scientific Reports. 2016;6:e35011.
- 737 53. Lau Q, Griffith JE and Higgins DP. Identification of MHCII variants associated with chlamydial  
738 disease in the koala (*Phascolarctos cinereus*). PeerJ. 2014;2:443.
- 739 54. Robbins A, Hanger J, Jelocnik M, Quigley BL and Timms P. Koala immunogenetics and  
740 chlamydial strain type are more directly involved in chlamydial disease progression in koalas  
741 from two south east Queensland koala populations than koala retrovirus subtypes. Scientific  
742 Reports. 2020;10 1:15013. doi:10.1038/s41598-020-72050-2.
- 743 55. Owen RS and Siddle HV. Devil Facial Tumours: Towards a Vaccine. Immunological  
744 Investigations. 2019;48 7:719-36. doi:10.1080/08820139.2019.1624770.
- 745 56. Phillips S, Quigley BL and Timms P. Seventy years of *Chlamydia* vaccine research - limitations  
746 of the past and directions for the future. Frontiers in Microbiology. 2019;10 70.
- 747 57. Dudchenko O, Shamim MS, Batra SS, Durand NC, Musial NT, Mostofa R, et al. The Juicebox  
748 Assembly Tools module facilitates *de novo* assembly of mammalian genomes with  
749 chromosome-length scaffolds for under \$1000. bioRxiv. 2018:254797. doi:10.1101/254797.

- 750 58. Dudchenko O, Batra SS, Omer AD, Nyquist SK, Hoeger M, Durand NC, et al. De novo  
751 assembly of the *Aedes aegypti* genome using Hi-C yields chromosome-length scaffolds.  
752 Science advances. 2017;356:92-5.
- 753 59. Peel E, Silver L, Brandies P, Hogg CJ and Belov K. A reference genome for the critically  
754 endangered woylie, *Bettongia penicillata ogilbyi*. Gigabyte. 2021;1  
755 doi:<https://doi.org/10.46471/gigabyte.35>.
- 756 60. Brandies PA, Tang S, Johnson RSP, Hogg CJ and Belov K. The first *Antechinus* reference  
757 genome provides a resource for investigating the genetic basis of semelparity and age-  
758 related neuropathologies. Gigabyte. 2020;2020:0. doi:10.46471/gigabyte.7.
- 759 61. Peel E, Silver L, Brandies PA, Hayakawa T, Belov K and Hogg CJ. Genome assembly of the  
760 numbat (*Myrmecobius fasciatus*), the only termitivorous marsupial. Gigabyte. 2022;  
761 doi:<https://doi.org/10.46471/gigabyte.47>.
- 762 62. Camacho C, Coulouris G, Avagyan V, Ma N, Papadopoulos J, Bealer K, et al. BLAST+:  
763 architecture and applications. BMC bioinformatics. 2009;10 421.
- 764 63. Eddy SR. A probabilistic model of local sequence alignment that simplifies statistical  
765 significance estimation. PLOS Computational Biology. 2008;4 5:e1000069.
- 766 64. Belov K, Lam MKP, Hellman L and Colgan DJ. Evolution of the major histocompatibility  
767 complex: isolation of the class II beta cDNAs from two monotremes, the platypus and the  
768 short-beaked echidna. Immunogenetics. 2003;55:402-11.
- 769 65. Belov K and Hellman L. Immunoglobulin genetics of *Ornithorhynchus anatinus* (platypus) and  
770 *Tachyglossus aculeatus* (short-beaked echidna). Comparative Biochemistry and Physiology.  
771 2003;136:811-9.
- 772 66. Wong ESW, Sanderson CE, Deakin JE, Whittington CM, Papenfuss AT and Belov K.  
773 Identification of natural killer cell receptor clusters in the platypus genome reveals an  
774 expansion of C-type lectin genes. Immunogenetics. 2009;61:565-79.
- 775 67. Dohm JC, Tsend-Ayush E, Reinhardt R, Grutzner F and Himmelbauer H. Distribution and  
776 pseudoautosomal localization of the major histocompatibility complex in monotremes.  
777 Genome Biology. 2007;8:R175-R.16.
- 778 68. Papenfuss AT, Feng Z, Krasnec K, Deakin JE, Baker ML and Miller RD. Marsupials and  
779 monotremes possess a novel family of MHC class I genes that is lost from the eutherian  
780 lineage. BMC Genomics. 2015;16:535.
- 781 69. Nowak MA, Parra ZE, Hellman L and Miller RD. The complexity of expressed kappa light  
782 chains in egg-laying mammals. Immunogenetics. 2004;56:555-63.
- 783 70. Johansson J, Aveskogh M, Munday BL and Hellman L. Heavy chain V region diversity in the  
784 duck-billed platypus (*Ornithorhynchus anatinus*): long and highly variable complementary-  
785 determining region 3 compensates for limited germline diversity. The Journal of  
786 Immunology. 2002;168:5155-62.
- 787 71. Johansson J, Salazar JN, Aveskogh M, Munday B, Miller RD and Hellman L. High variability in  
788 complementarity-determining regions compensates for a low number of V gene families in  
789 the  $\lambda$  light chain locus of the platypus. European Journal of Immunology. 2005;35 10:3008-  
790 19. doi:<https://doi.org/10.1002/eji.200425574>.
- 791 72. Parra ZE, Arnold T, Nowak MA, Hellman L and Miller RD. TCR gamma chain diversity in the  
792 spleen of the duckbill platypus (*Ornithorhynchus anatinus*). Developmental and Comparative  
793 Immunology. 2006;30:699-71.
- 794 73. Parra ZE, Lillie M and Miller RD. A model for the evolution of the mammalian T-cell receptor  
795 alpha/delta and mu loci based on evidence from the duckbill platypus. Molecular Biology  
796 and Evolution. 2012;29 10:3205-14.
- 797 74. Wang X, Parra ZE and Miller RD. Platypus TCRmu provides insight into the origins and  
798 evolution of a uniquely mammalian TCR locus. The Journal of Immunology. 2011;187:5246-  
799 54.



- 800 75. Wong ESW, Papenfuss AT, Miller RD and Belov K. Hatching time for monotreme  
801 immunology. Australian Journal of Zoology. 2006;57:185-98.
- 802 76. Belov K, Sanderson CE, Deakin JE, Wong ESW, Assange D, McColl KA, et al. Characterization  
803 of the opossum immune genome provides insight into the evolution of the mammalian  
804 immune system. Genome Research. 2007;17:982-91.
- 805 77. Lau Q, Jobbins SE, Belov K and Higgins DP. Characterisation of four major histocompatibility  
806 complex class II genes of the koala (*Phascolarctos cinereus*). Immunogenetics. 2013;65:37-  
807 46.
- 808 78. Jobbins SE, Sanderson CE, Griffith JE, Krockenberger MB, Belov K and Higgins DP. Diversity of  
809 MHC class II *DAB1* in the koala (*Phascolarctos cinereus*). Australian Journal of Zoology.  
810 2012;60 1:1-9. doi:<https://doi.org/10.1071/ZO12013>.
- 811 79. Cheng Y, Polkinghorne A, Gillett A, Jones EA, O'Meally D, Timms P, et al. Characterisation of  
812 MHC class I genes in the koala. Immunogenetics. 2018;70:125-33.
- 813 80. Matthew M, Beagley KW, Timms P and Polkinghorne A. preliminary characterisation of  
814 tumour necrosis factor alpha and interleukin-10 responses to *Chlamydia pecorum* infection  
815 in the koala (*Phascolarctos cinereus*). PLOS one. 2013;8 3:e59958.
- 816 81. Matthew M, Pavasovic A, Prentis PJ, Beagley KW, Timms P and Polkinghorne A. Molecular  
817 characterisation and expression analysis of Interferon gamma in response to natural  
818 *Chlamydia* infection in the koala, *Phascolarctos cinereus*. Gene. 2013;527:570-7.
- 819 82. Mathew M, Waugh C, Beagley KW, Timms P and Polkinghorne A. Interleukin 17A is an  
820 immune marker for chlamydial disease severity and pathogenesis in the koala (*Phascolarctos*  
821 *cinereus*). Developmental & Comparative Immunology. 2014;46 2:423-9.  
822 doi:<http://dx.doi.org/10.1016/j.dci.2014.05.015>.
- 823 83. Maher IE, Griffith JE, Lau Q, Reeves T and Higgins DP. Expression profiles of the immune  
824 genes CD4, CD8 beta, IFN gamma, IL-4, IL-6 and IL-10 in mitogen-stimulated koala  
825 lymphocytes (*Phascolarctos cinereus*) by qRT-PCR. PeerJ. 2014;2.
- 826 84. Miller RD. Those other mammals: The immunoglobulins and T cell receptors of marsupials  
827 and monotremes. Seminars in Immunology. 2010;22:3-9.
- 828 85. Parra ZE, Baker ML, Hathaway J, Lopez AM, Trujillo J, Sharp A, et al. Comparative genomic  
829 analysis and evolution of the T cell receptor loci in the opossum *Monodelphis domestica*.  
830 BMC Genomics. 2008;9 111:1-19.
- 831 86. Siddle HV, Deakin JE, Coggill P, Whilming LG, Harrow J, Kaufman J, et al. The tammar wallaby  
832 major histocompatibility complex shows evidence of past genomic instability. BMC  
833 Genomics. 2011;12:421.
- 834 87. Cheng Y, Siddle HV, Beck S, Eldridge MDB and Belov K. High levels of genetic variation at  
835 MHC class II DBB loci in the tammar wallaby (*Macropus eugenii*). Immunogenetics.  
836 2009;61:111-8.
- 837 88. Zuccolotto P, Harrison GA and Deane EM. Cloning of marsupial T cell receptor alpha and  
838 beta constant region cDNAs. Immunology and Cell Biology. 2000;78 2:103-9.
- 839 89. Daly KA, Digby M, Lefevre C, Mailer S, Thomson P, Nicholas KR, et al. Analysis of the  
840 expression of immunoglobulins throughout lactation suggests two periods of immune  
841 transfer in the tammar wallaby (*Macropus eugenii*). Veterinary Immunology and  
842 Immunopathology. 2007;120:187-200.
- 843 90. Frankish A, Diekhans M, Ferreira A-M, Johnson R, Jungreis I, Loveland J, et al. GENCODE  
844 reference annotation for the human and mouse genomes. Nucleic Acids Research. 2018;47  
845 D1:D766-D73. doi:10.1093/nar/gky955.
- 846 91. Perteau M, Shumate A, Perteau G, Varabyou A, Breitwieser FP, Chang Y-C, et al. CHES: a new  
847 human gene catalog curated from thousands of large-scale RNA sequencing experiments  
848 reveals extensive transcriptional noise. Genome Biology. 2018;19 1:208.  
849 doi:10.1186/s13059-018-1590-2.

- 850 92. Lefranc M-P, Giudicelli V, Duroux P, Jabado-Michaloud J, Folch G, Aouinti S, et al. IMGT®, the  
851 international ImMunoGeneTics information system® 25 years on. *Nucleic Acids Research*.  
852 2015;43 D1:D413-D22. doi:10.1093/nar/gku1056.
- 853 93. Salzberg SL. Next-generation genome annotation: we still struggle to get it right. *Genome*  
854 *Biology*. 2019;20 1:92. doi:10.1186/s13059-019-1715-2.
- 855 94. Ensembl: Manual gene annotation by Havana.  
856 [https://m.ensembl.org/info/genome/genebuild/manual\\_havana.html](https://m.ensembl.org/info/genome/genebuild/manual_havana.html) (2021). Accessed 19th  
857 July 2021.
- 858 95. National Center for Biotechnology Information: The NCBI Eukaryotic Genome Annotation  
859 Pipeline. [https://www.ncbi.nlm.nih.gov/genome/annotation\\_euk/process/](https://www.ncbi.nlm.nih.gov/genome/annotation_euk/process/) (2021). Accessed  
860 19th July 2021.
- 861 96. Ensembl: Gene annotation in Ensembl.  
862 <https://m.ensembl.org/info/genome/genebuild/index.html> (2021). Accessed 19th July 2021.
- 863 97. National Center for Biotechnology Information: Updating information on GenBank genome  
864 records. [https://www.ncbi.nlm.nih.gov/genbank/wgs\\_update/](https://www.ncbi.nlm.nih.gov/genbank/wgs_update/) (2021). Accessed 4th August  
865 2021.
- 866 98. Weisenfeld NI, Kumar V, Shah P, Church DM and Jaffe DB. Direct determination of diploid  
867 genome sequences. *Genome Research*. 2017;27 5:757-67. doi:10.1101/gr.214874.116.
- 868 99. Lieberman-Aiden E, van Berkum NL, Williams L, Imakaev M, Ragoczy T, Telling A, et al.  
869 Comprehensive Mapping of Long-Range Interactions Reveals Folding Principles of the  
870 Human Genome. *Science*. 2009;326 5950:289. doi:10.1126/science.1181369.
- 871 100. Luo J, Wei Y, Lyu M, Wu Z, Liu X, Luo H, et al. A comprehensive review of scaffolding  
872 methods in genome assembly. *Briefings in Bioinformatics*. 2021; doi:10.1093/bib/bbab033.
- 873 101. Durand NC, Robinson JT, Shamim MD, Machol I, Mesirov JP, Lander ES, et al. Juicebox  
874 provides a visualisation system for Hi-C contact maps with unlimited zoom. *Cell Systems*.  
875 2016;3:99-101.
- 876 102. Ghurye J, Rhie A, Walenz BP, Schmitt A, Selvaraj S, Pop M, et al. Integrating Hi-C links with  
877 assembly graphs for chromosome-scale assembly. *PLOS Computational Biology*. 2019;15  
878 8:e1007273. doi:10.1371/journal.pcbi.1007273.
- 879 103. Burton JN, Adey A, Patwardhan RP, Qiu R, Kitzman JO and Shendure J. Chromosome-scale  
880 scaffolding of de novo genome assemblies based on chromatin interactions. *Nature*  
881 *Biotechnology*. 2013;31 12:1119-25. doi:10.1038/nbt.2727.
- 882 104. Marks P, Garcia S, Barrio AM, Belhocine K, Bernate J, Bharadwaj R, et al. Resolving the full  
883 spectrum of human genome variation using Linked-Reads. *Genome Research*. 2019;29  
884 4:635-45. doi:10.1101/gr.234443.118.
- 885 105. 10x Genomics: Molecule length calculation. [https://support.10xgenomics.com/de-novo-](https://support.10xgenomics.com/de-novo-assembly/software/pipelines/latest/output/moleculelen)  
886 [assembly/software/pipelines/latest/output/moleculelen](https://support.10xgenomics.com/de-novo-assembly/software/pipelines/latest/output/moleculelen) (2020). Accessed 22nd July 2021.
- 887 106. 10x Genomics: Supernova version 2.x performance. [https://support.10xgenomics.com/de-](https://support.10xgenomics.com/de-novo-assembly/software/overview/latest/performance)  
888 [novo-assembly/software/overview/latest/performance](https://support.10xgenomics.com/de-novo-assembly/software/overview/latest/performance) (2020). Accessed 22nd July 2021.
- 889 107. Ho SS, Urban AE and Mills RE. Structural variation in the sequencing era. *Nature Reviews*  
890 *Genetics*. 2020;21 3:171-89. doi:10.1038/s41576-019-0180-9.
- 891 108. Ott A, Schnable JC, Cheng-Ting Y, Wu L, Liu C, Heng-Cheng H, et al. Linked read technology  
892 for assembling large complex and polyploid genomes. *BMC Genomics*. 2018;19  
893 doi:<http://dx.doi.org/10.1186/s12864-018-5040-z>.
- 894 109. Damas J, Corbo M and Lewin HA. Vertebrate Chromosome Evolution. *Annual Review of*  
895 *Animal Biosciences*. 2021;9 1:1-27. doi:10.1146/annurev-animal-020518-114924.
- 896 110. Zoonomia Consortium. A comparative genomics multitool for scientific discovery and  
897 conservation. *Nature*. 2020;587 7833:240-5. doi:10.1038/s41586-020-2876-6.
- 898 111. Ceballos FC, Joshi PK, Clark DW, Ramsay M and Wilson JF. Runs of homozygosity: windows  
899 into population history and trait architecture. *Nature Reviews Genetics*. 2018;19 4:220-34.  
900 doi:10.1038/nrg.2017.109.

901 112. Genome 10K Community of Scientists. Genome 10K: a proposal to obtain whole-genome  
902 sequence for 10 000 vertebrate species. *Journal of Heredity*. 2009;100 6:659-74.

903 113. Kingan SB, Heaton H, Cudini J, Lambert CC, Baybayan P, Galvin BD, et al. A High-Quality De  
904 novo Genome Assembly from a Single Mosquito Using PacBio Sequencing. *Genes*. 2019;10  
905 1:62. doi:10.3390/genes10010062.

906 114. Lawniczak M, Blaxter M, Johnson WE, Pettersson OV, Barker K and The Sample Collection  
907 and Processing Subcommittee. *Report on sample collection and processing standards*.  
908 March 2021 2021. Earth Biogenomne Project,.

909 115. Afgan E, Baker D, Batut B, van den Beek M, Bouvier D, Čech M, et al. The Galaxy platform for  
910 accessible, reproducible and collaborative biomedical analyses: 2018 update. *Nucleic Acids  
911 Research*. 2018;46 W1:W537-W44. doi:10.1093/nar/gky379.

912 116. Mistry J, Finn RD, Eddy SR, Bateman A and Punta M. Challenges in homology search:  
913 HMMER3 and convergent evolution of coiled-coil regions. *Nucleic Acids Research*. 2013;41  
914 12:e121-e. doi:10.1093/nar/gkt263.

915 117. Hall T. *BioEdit v7.2.2 ed.*: Ibis Biosciences, 2013.

916 118. Mistry J, Chuguransky S, Williams L, Qureshi M, Salazar Gustavo A, Sonnhammer ELL, et al.  
917 Pfam: The protein families database in 2021. *Nucleic Acids Research*. 2020;49 D1:D412-D9.  
918 doi:10.1093/nar/gkaa913.

919 119. Letunic I, Khedkar S and Bork P. SMART: recent updates, new developments and status in  
920 2020. *Nucleic Acids Research*. 2020;49 D1:D458-D60. doi:10.1093/nar/gkaa937.

921 120. Kumar S, Stecher G, Li M, Knyaz C and Tamura K. MEGA X: Molecular Evolutionary Genetics  
922 Analysis across Computing Platforms. *Molecular biology and evolution*. 2018;35 6:1547-9.  
923 doi:10.1093/molbev/msy096.

924 121. Peel E, Silver L, Brandies PA, Hayakawa T, Belov K and Hogg CJ. Supporting data for "Genome  
925 assembly of the numbat (*Myrmecobius fasciatus*), the only termitivorous marsupial. GigaDB.  
926 2022; doi:<http://dx.doi.org/10.5524/100999>.

927 122. Peel E, Silver L, Brandies PA, Hogg CJ and Belov K. Supporting data for "A reference genome  
928 for the critically endanfered woylie, *Bettongia penicillata ogilbyi*". GigaDB. 2021;  
929 doi:<http://dx.doi.org/10.5524/100951>.

930

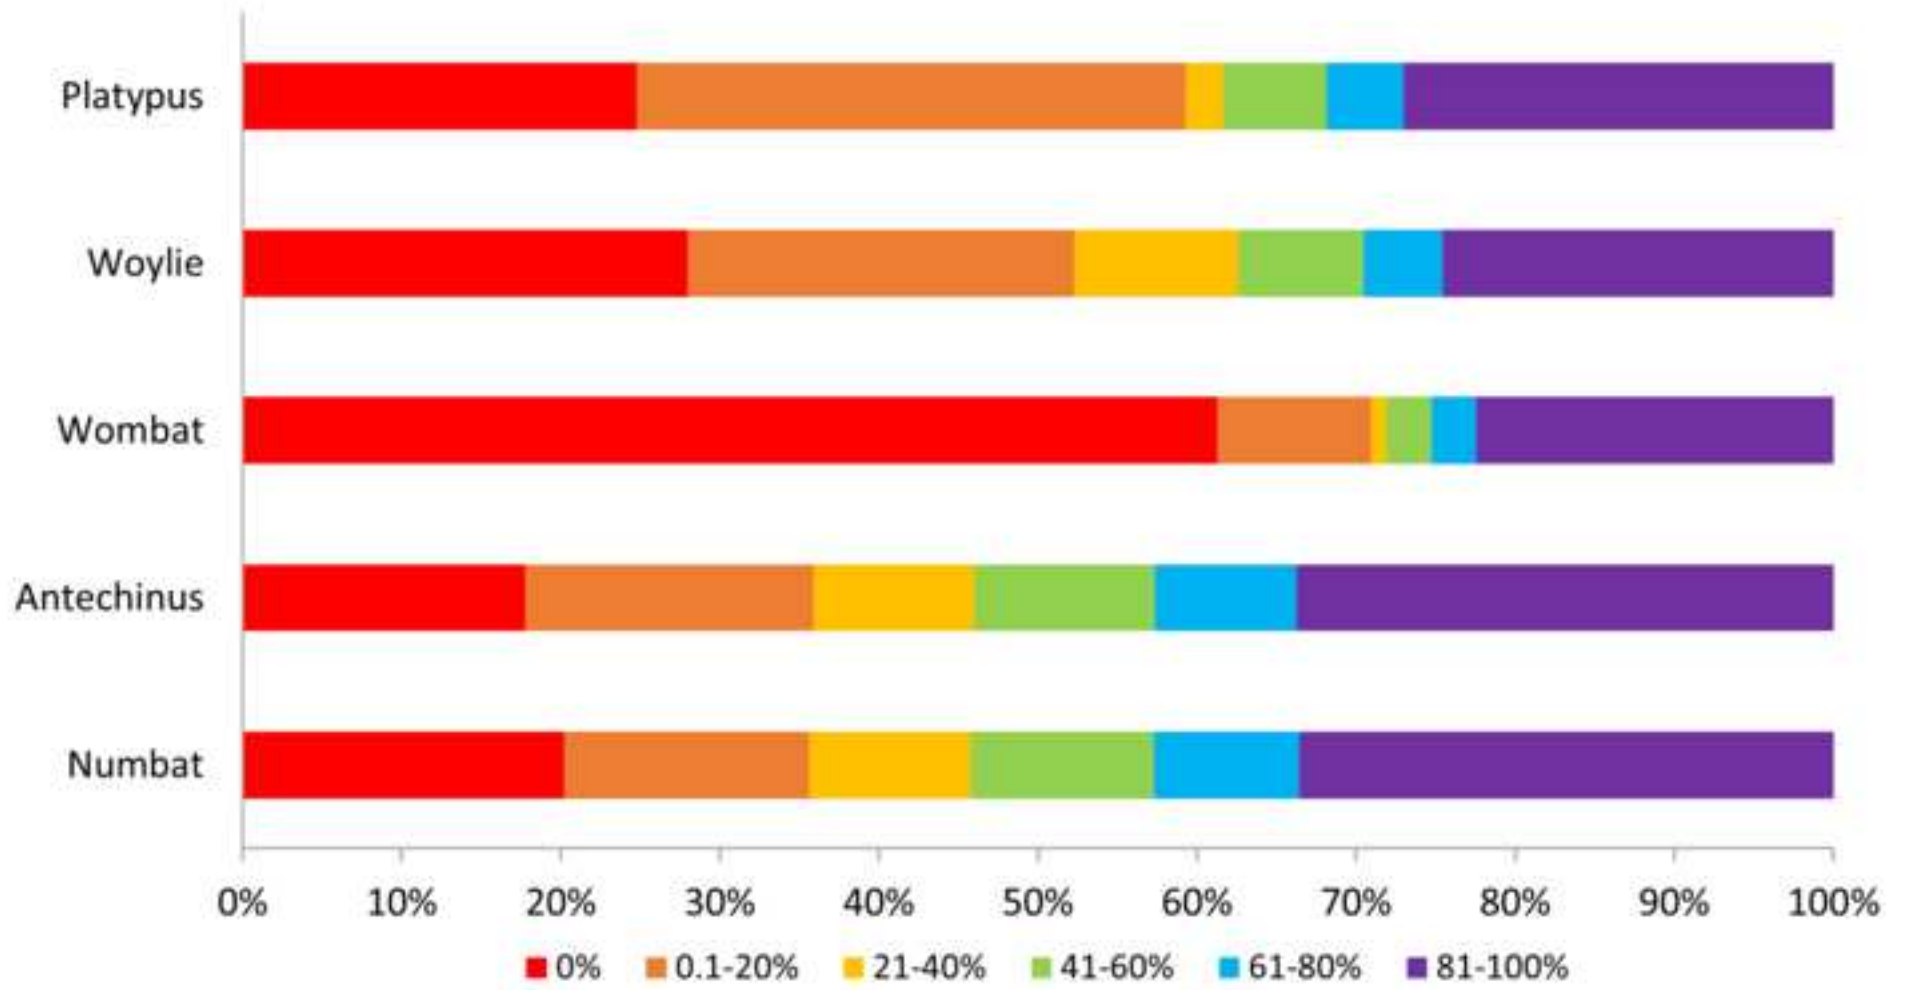

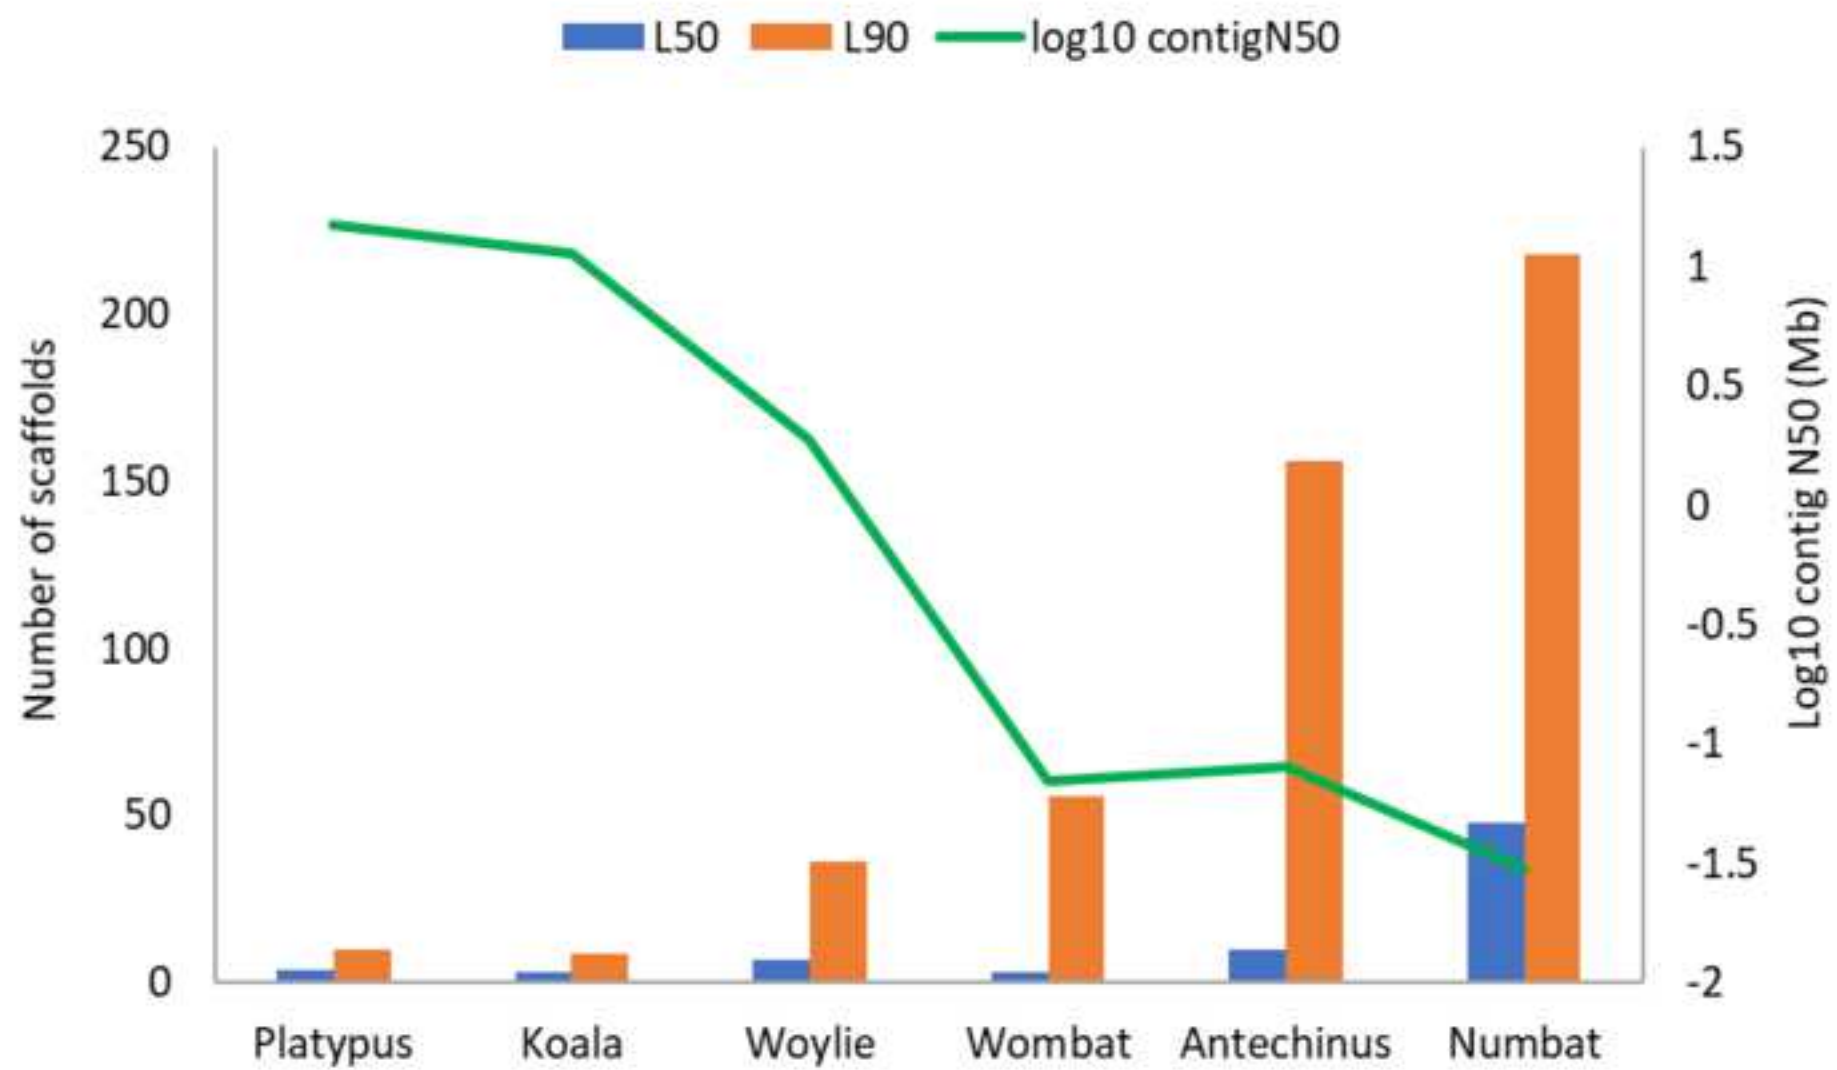

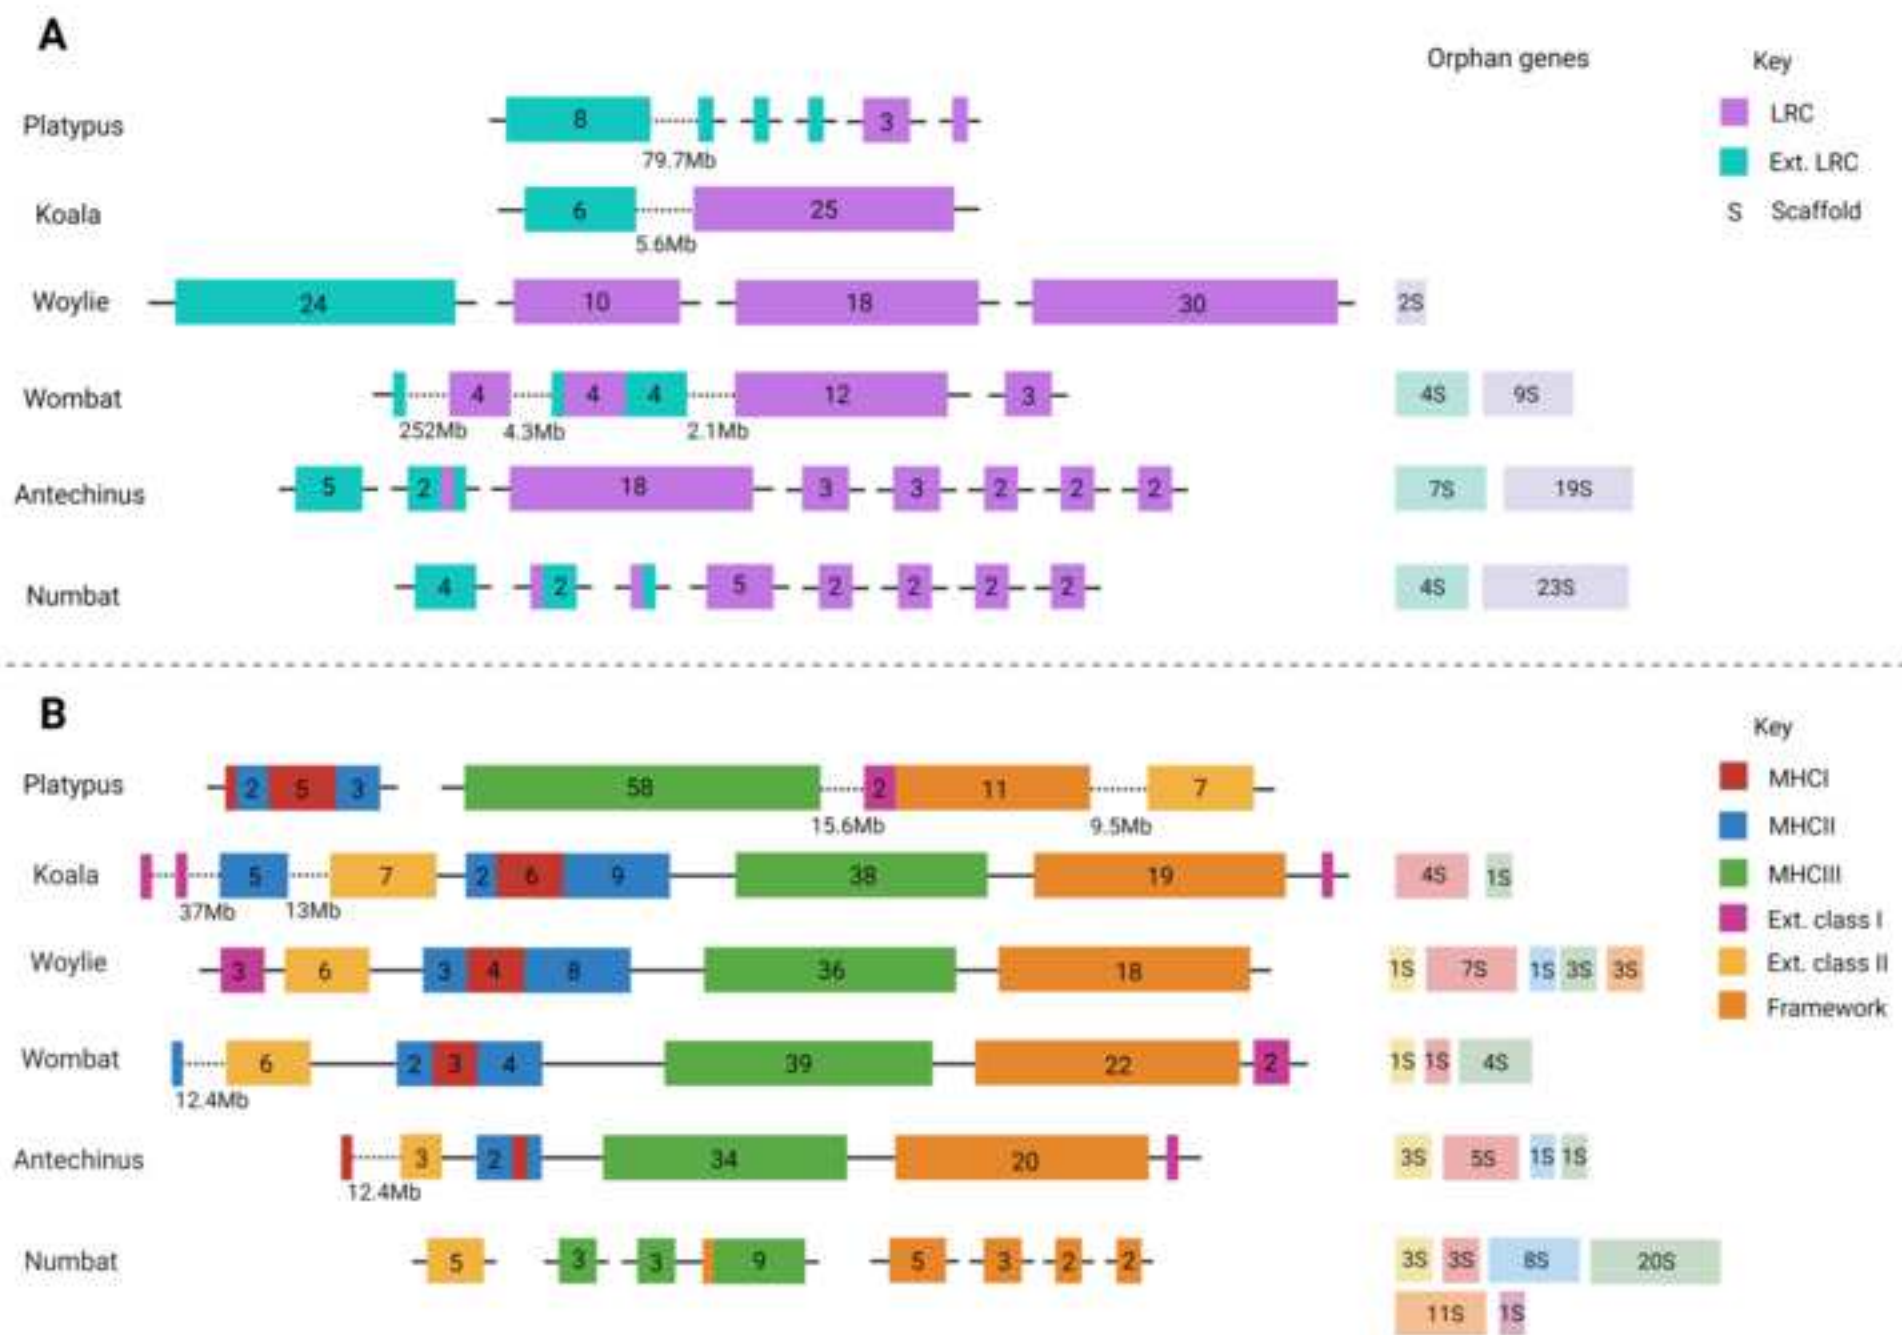

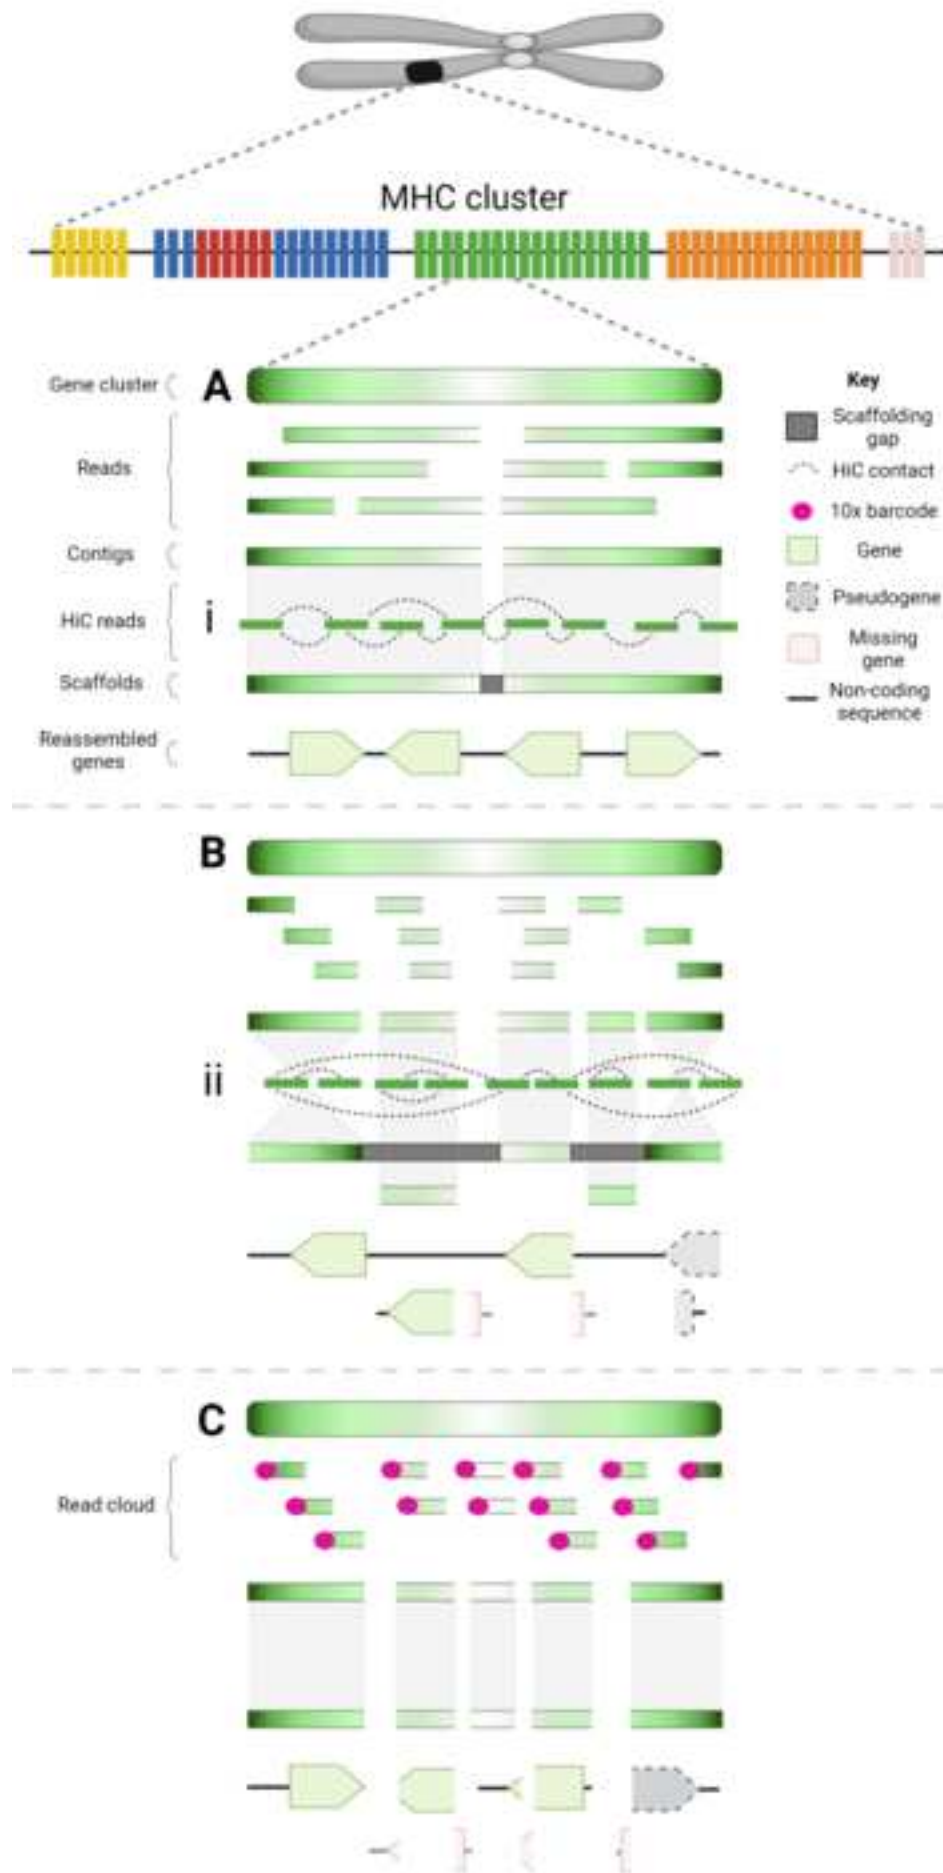

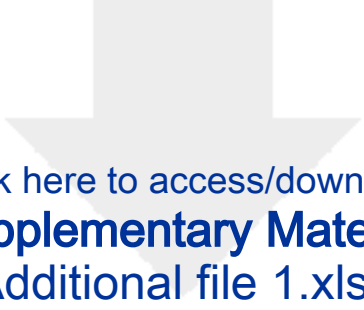

Click here to access/download  
**Supplementary Material**  
Additional file 1.xlsx



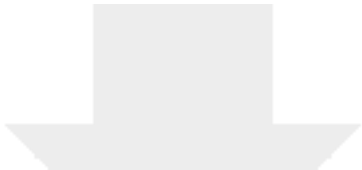

Click here to access/download  
**Supplementary Material**  
Additional file 2.docx



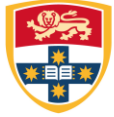

THE UNIVERSITY OF  
**SYDNEY**

**Professor Katherine Belov AO** *BSc (Hons) PhD*  
Pro Vice-Chancellor Global Engagement

24<sup>th</sup> March 2022

Dr Scott Edmunds  
Chief Editor  
GigaScience

Dear Dr Edmunds,

Please find attached our manuscript "*Best genome sequencing strategies for annotation of complex immune gene families in wildlife*" which we are submitting as a research article for publication in GigaScience. The text of the manuscript totals 7139 words, with four figures, two tables and two additional files.

Globally we are in the midst of a biodiversity crisis and infectious diseases are a major driver of wildlife decline. The COVID-19 pandemic highlights the impact of wildlife disease on animal and human health, and provides impetus for studying immune genes in wildlife. Despite the recent increase in genomes for wildlife species, our understanding of immune genes in these species is limited owing to their high level of polymorphism and complex genomic organisation which makes assembly and annotation notoriously difficult.

Our research over the past decade and a half on Tasmanian devils and koalas highlights the importance of genomics and accurate immune annotation for wildlife disease investigations. As such, we are increasingly asked the minimum genome quality required to effectively annotate immune genes which underpin wildlife disease investigations. In this manuscript we aim to answer this question by manually annotating immune genes in five marsupial genomes and one monotreme genome of different qualities to determine the impact of sequencing strategy and automated annotation on accurate immune annotation.

We determined that high-quality chromosome-length genome assemblies generated using long-reads and scaffolding technologies are required to accurately annotate immune genes. Draft-quality genomes generated using short-reads and HiC technology, or 10x Chromium linked-read technology, resulted in highly fragmented immune genes which led to incorrect annotation and prevented interpretation of genomic organisation and gene family evolution.

While the six genomes in this study displayed BUSCO scores of up to 94.1% indicating functional completeness, we also show that automated annotation programs need improvement, as up to 60% of manually annotated immune genes were not accurately annotated by automated programs. Deficient annotations within functionally important immune gene families will flow through to downstream analysis and result in spurious results.

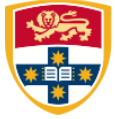

THE UNIVERSITY OF  
SYDNEY

We have targeted GigaScience as this work provides a strong example for the importance of gold standard genome assemblies for studying wildlife disease and will appeal to researchers involved in sequencing, assembly, annotation and translation of genomics data. The content of this manuscript has not been published or submitted for publication elsewhere. The authors declare no competing interests, and all have approved the manuscript for submission. We hope you will agree that this work represents an important contribution to GigaScience.

Yours sincerely,

A handwritten signature in black ink that reads "KBelov".

Professor Kathy Belov  
Corresponding Author  
On Behalf of co-authors Emma Peel, Luke Silver, Parice Brandies, Ying Zhu, Yuanyuan Cheng and Carolyn Hogg
