# Supplementary material for: Best genome sequencing strategies for annotation of complex immune gene families in wildlife
Source: PubMed Central journal article supplement (PMC9618407; doi:10.1093/gigascience/giac100), 2022-10-30
Supplement: giac100_response_to_reviewer_comments_revision_1.pdf [file giac100_response_to_reviewer_comments_revision_1.pdf]

## Author's Response To Reviewer Comments

Close

Amendments made as requested to the data availability section

Close
